# Supplementary material for: Discovery of a novel methionine biosynthetic route via O-phospho-L-homoserine
Source: Research Square preprint supplement (doi:10.21203/rs.3.rs-4361835/v1), 2024-05-15
Supplement: Supplementary file 1 [file 77cdcb5513737274d5e5d47d.xlsx]

## Sheet: Streptomyces_MetM homologs
Organism Name	Organism Infraspecific Names Strain	MetM homologs (RefSeq)	(INSDC)	Query Cover(%)	id(%)
Streptomyces avermitilis MA-4680 = NBRC 14893	MA-4680	WP_010985364.1	BAC71646.1	97	85.65
Streptomyces griseus subsp. griseus NBRC 13350	NBRC 13350	WP_012379741.1	BAG20057.1	97	86.28
Streptomyces scabiei 87.22	87.22		CBG72086.1	99	86.04
Streptomyces sviceus ATCC 29083	ATCC 29083	WP_007382897.1	EDY53705.1	100	93.06
Streptomyces himastatinicus ATCC 53653	ATCC 53653		EFL25176.1	99	87.84
Streptomyces viridochromogenes DSM 40736	DSM 40736	WP_003991134.1	EFL33023.1	98	84.58
Streptomyces xinghaiensis S187	S187	WP_039823762.1		99	81.92
Streptomyces zinciresistens K42	K42	WP_007493266.1	EGX60350.1	97	85.48
Streptomyces acidiscabies 84-104	84-104	WP_029183495.1		95	87.23
Streptomyces xiaopingdaonensis	DUT 180	WP_029391233.1		97	81.94
Streptomyces auratus AGR0001	AGR0001		QTZ93483.1	100	93.56
Streptomyces rimosus subsp. rimosus ATCC 10970	ATCC 10970	WP_030179972.1	QST82906.1	98	89.98
Streptomyces davaonensis JCM 4913	JCM 4913	WP_015659605.1	CCK29264.1	97	87.09
Streptomyces albidoflavus	J1074		AGI88768.1	99	87.53
Streptomyces hokutonensis	R1-NS-10	WP_019072478.1		96	86.16
Streptomyces sulphureus DSM 40104	DSM 40104	WP_019549555.1		94	84.02
Streptomyces bottropensis ATCC 25435	ATCC 25435	WP_020115707.1		98	84.58
Streptomyces purpureus KA281	KA281	WP_106959813.1		99	85.06
Streptomyces flavidovirens DSM 40150	DSM 40150	WP_028811123.1		97	86.84
Streptomyces collinus Tu 365	Tu 365	WP_043475874.1		97	85.25
Streptomyces thermolilacinus SPC6	SPC6	WP_023587933.1	OEJ95640.1	95	90.6
Streptomyces niveus NCIMB 11891	NCIMB 11891	WP_031230973.1		95	90.14
Streptomyces roseochromogenus subsp. oscitans DS 12.976	DS 12.976	WP_031225484.1		97	86.65
Streptomyces griseorubens	JSD-1	WP_033276121.1	KEG41537.1	97	85.51
Streptomyces monomycini	NRRL B-24309	WP_030022299.1		98	89.28
Streptomyces xylophagus	NRRL B-12029	WP_043673458.1		95	86.51
Streptomyces wedmorensis	NRRL 3426	WP_078905213.1		99	87.36
Streptomyces bikiniensis	NRRL ISP-5580	WP_078489837.1		99	87.59
Streptomyces alboflavus	NRRL B-2373	WP_078619614.1		100	88.18
Streptomyces yerevanensis	NRRL B-16943	WP_033322390.1		96	87.11
Streptomyces novaecaesareae	NRRL B-1267	WP_030057069.1		95	82.17
Streptomyces atroolivaceus	NRRL ISP-5137	WP_033297193.1		97	88.11
Streptomyces iakyrus	NRRL ISP-5482	WP_033312256.1		97	86.42
[Kitasatospora] papulosa	NRRL B-16504	WP_014154855.1		97	88.34
Streptomyces flavochromogenes	NRRL B-2684	WP_078944852.1		99	86.9
Streptomyces violens	NRRL ISP-5597	WP_030254576.1		97	91.55
Streptomyces violaceorubidus	NRRL B-16381	WP_030186290.1		97	87.44
Streptomyces catenulae	NRRL B-2342	WP_030285855.1		98	88.37
Streptomyces scopuliridis RB72	NRRL B-24574	WP_030353344.1		95	89.66
Streptomyces cyaneofuscatus	NRRL B-2570	WP_030566845.1		97	86.95
Streptomyces fulvoviolaceus	NRRL B-2870	WP_030595822.1		97	86.85
Streptomyces niger	NRRL B-3857	WP_110943820.1		95	91.81
Streptomyces globisporus subsp. globisporus	NRRL B-2709	WP_030591102.1		97	86.68
Streptomyces lavenduligriseus	NRRL ISP-5487	WP_030779554.1		97	86.42
Streptomyces varsoviensis	NRRL ISP-5346	WP_030881197.1		98	87.91
Streptomyces megasporus	NRRL B-16372	WP_031509473.1		97	85.92
Streptomyces avicenniae	NRRL B-24776	WP_052848600.1		98	83.45
Streptomyces roseoverticillatus	NRRL B-3500	WP_078660268.1		99	89.45
Streptomyces bicolor	NRRL B-5348	WP_031478911.1		97	86.89
Streptomyces virginiae	NRRL ISP-5094	WP_030902177.1		97	87.32
Streptomyces ochraceiscleroticus	NRRL ISP-5594	WP_031056412.1		97	91.29
Streptomyces achromogenes subsp. achromogenes	NRRL B-2120	WP_030612177.1		97	85.95
Streptomyces griseolus	NRRL B-2925	WP_028439472.1		98	87.18
Streptomyces toyocaensis	NRRL 15009	WP_037930662.1	KES07524.1	97	86.05
Streptomyces durhamensis	NRRL B-3309	WP_031170932.1		97	85.25
Streptomyces aureus	NRRL B-1941	WP_037622290.1		98	86.25
Streptomyces exfoliatus	NRRL B-2924	WP_030556165.1		97	85.95
Streptomyces erythrochromogenes	NRRL B-2112	WP_078959662.1		99	87.79
Streptomyces aureocirculatus	NRRL ISP-5401	WP_030569255.1		95	88.01
Streptomyces flavovariabilis	NRRL B-16367	WP_031135856.1		97	86.42
Streptomyces mutabilis	TRM 45540	WP_043381779.1	KFG74593.1	97	83.98
Streptomyces pluripotens	MUSC 135	WP_039654788.1	ARP71557.1	97	84.78
Streptomyces lydicamycinicus	NBRC 110027		GAO05728.1	97	92.02
Streptomyces vietnamensis	GIM4.0001		AJF69885.1	99	86.21
Streptomyces natalensis ATCC 27448	ATCC 27448	WP_044368569.1	KIZ13652.1	98	94.6
Streptomyces rubellomurinus	ATCC 31215	WP_045692315.1	KJS63423.1	95	81.97
Streptomyces katrae	NRRL ISP-5550	WP_211275147.1		99	85.68
Streptomyces antioxidans	MUSC 164	WP_046088676.1	OPF84634.1	97	86.11
Streptomyces mangrovisoli	MUSC 149	WP_046591249.1	OIJ69813.1	97	85.75
Streptomyces malaysiense	MUSC 136	WP_046422155.1	OIK26933.1	97	85.71
Streptomyces odonnellii	NRRL B-24891	WP_046501380.1		97	87.59
Streptomyces europaeiscabiei	NRRL B-24443	WP_046709520.1		98	84.58
Streptomyces xiamenensis	318		AKG44553.1	97	85.35
Streptomyces humi	MUSC 119	WP_046730950.1		97	85.95
Streptomyces showdoensis	ATCC 15227	WP_123955072.1		99	88.05
Streptomyces leeuwenhoekii	C34 (= DSM 42122 = NRRL B-24963)	WP_029387399.1	CQR63371.1	97	86.38
Streptomyces incarnatus	NRRL 8089	WP_208900172.1	AKJ12392.1	97	86.42
Streptomyces roseus	ATCC 31245	WP_048475768.1	KMO98504.1	97	87.56
Streptomyces caatingaensis	CMAA 1322	WP_049716490.1	KNB51484.1	97	84
Streptomyces stelliscabiei	P3825	WP_046917989.1	KND41064.1	98	84.81
Streptomyces ambofaciens ATCC 23877	ATCC 23877	WP_053133041.1	AKZ56460.1	97	86.14
Streptomyces azureus	ATCC 14921	WP_059417380.1		97	85.28
Streptomyces pristinaespiralis	HCCB 10218	WP_037774345.1	ALC22414.1	98	86.77
Streptomyces chattanoogensis	NRRL ISP-5002	WP_053922491.1	KPC66270.1	98	93.44
Streptomyces atriruber	NRRL B-24165	WP_055567266.1		97	87.67
Streptomyces hirsutus	NRRL B-2713	WP_055597376.1		97	85.71
Streptomyces ossamyceticus	NRRL B-3822	WP_055518757.1		99	85.45
Streptomyces pathocidini	NRRL B-24287	WP_055472115.1		98	85.75
Streptomyces graminilatus	NRRL B-59124	WP_055532837.1		95	86.09
Streptomyces silaceus	NRRL B-24166	WP_055699344.1		97	88.6
Streptomyces torulosus	NRRL B-3889	WP_055714168.1		99	85.91
Streptomyces niveiscabiei	NRRL B-24457	WP_055724076.1		99	84.56
Streptomyces roseifaciens	MBT76	WP_058045774.1		97	89.18
Streptomyces kanasensis	ZX01	WP_058945333.1	KUH35379.1	97	88.34
Streptomyces turgidiscabies	T45	WP_006382334.1	GAQ74339.1	96	84.67
Streptomyces specialis	type strain: GW41-1564	WP_199827611.1		96	87.59
Streptomyces regalis	NRRL 3151	WP_062707624.1	KUL27236.1	97	86.21
Streptomyces pseudovenezuelae	DSM 40212	WP_031050798.1	KUM82566.1	97	86.42
Streptomyces cellostaticus	DSM 40189	WP_067005067.1	KUM92760.1	97	86.89
Streptomyces curacoi	DSM 40107	WP_062153400.1	KUM72329.1	97	86.71
Streptomyces yokosukanensis	DSM 40224	WP_067120748.1	KUN07465.1	97	86.42
Streptomyces corchorusii	DSM 40340	WP_014673419.1	KUN22574.1	97	85.71
Streptomyces antibioticus	DSM 40234	WP_059195842.1	KUN21178.1	97	86.21
Streptomyces longwoodensis	DSM 41677	WP_067234407.1	KUN37403.1	97	85.15
Streptomyces canus	DSM 40017	WP_057608615.1	KUN69851.1	97	86.65
Streptomyces griseoruber	DSM 40281	WP_055636800.1	KUN79990.1	97	84.03
Streptomyces bungoensis	DSM 41781	WP_061918627.1	KUN87622.1	97	85.95
Streptomyces caeruleatus	NRRL B-24802	WP_062723716.1	KUN94856.1	97	85.98
Streptomyces resistomycificus	DSM 40133	WP_030043556.1	KUN96474.1	97	86.18
Streptomyces dysideae	RV15	WP_067020687.1	KUO20516.1	97	86.15
Streptomyces griseochromogenes	ATCC 14511	WP_067316000.1	ANP55805.1	97	86.85
Streptomyces qaidamensis	S10	WP_062927578.1	AMW11239.1	97	86.18
Streptomyces chilikensis	RC 1830	WP_166021719.1		94	86.86
Streptomyces jeddahensis	G25	WP_067272213.1	OAH15779.1	96	89.1
Streptomyces parvulus	2297	WP_181849144.1		97	86.74
Streptomyces mutomycini	NRRL B-65393	WP_065848748.1		97	87.88
Streptomyces lushanensis	NRRL B-24994	WP_066949622.1		97	87.59
Streptomyces sparsogenes	ATCC 25498	WP_065961015.1		97	86.14
Streptomyces hygroscopicus subsp. hygroscopicus	OsiSh-2	WP_062009253.1		94	88.62
Streptomyces fodineus	TW1S1	WP_069780186.1	AOR33619.1	97	85.71
Streptomyces agglomeratus	9-3-15	WP_069928207.1	OEJ52199.1	97	86.81
Streptomyces oceani	SCSIO 02100	WP_070195349.1	OEV04958.1	96	85.75
Streptomyces nanshensis	SCSIO 10429	WP_070018039.1	OEV10190.1	95	87.02
Streptomyces abyssalis	SCSIO 10390	WP_070013031.1	OEU89895.1	97	82.95
Streptomyces colonosanans	MUSC 93	WP_071369570.1	OIJ84884.1	97	85.65
Streptomyces monashensis	MUSC 1	WP_071382178.1	OIK04037.1	97	85.71
Streptomyces venezuelae	NRRL B-65442		APE23059.1	97	86.65
Streptomyces uncialis	DCA2648	WP_073783466.1	OKH95825.1	97	85.78
Streptomyces kebangsaanensis	SUK12	WP_073950830.1		97	84.78
Streptomyces amritsarensis	MTCC 11845	WP_060180076.1	OLZ65673.1	97	87.56
Streptomyces lydicus	GS93	WP_033266392.1		98	91.86
Streptomyces violaceoruber	S21	WP_083192681.1	ARF62523.1	99	85.71
Streptomyces gilvosporeus	F607		ARF56906.1	100	94.25
Streptomyces marincola	SCSIO 03032	WP_086159936.1	ARQ70077.1	96	84.69
Streptomyces swartbergensis	HMC13	WP_086602665.1	OUD01062.1	97	85.25
Streptomyces africanus	NRRL B-24243	WP_086564429.1		97	84.31
Streptomyces alboverticillatus	NRRL B-24281	WP_086568508.1		97	86.89
Streptomyces glaucescens	NRRL B-2706	WP_086735462.1		95	87.23
Streptomyces albovinaceus	NRRL B-2566	WP_030815340.1		97	86.45
Streptomyces carpinensis	NRRL B-16921	WP_086723969.1		97	86.45
Streptomyces recifensis	NRRL B-3811	WP_086690256.1		97	88.24
Streptomyces reticuliscabiei	NRRL B-24446	WP_006382334.1		96	84.67
Streptomyces thermovulgaris	NRRL B-12375	WP_067397744.1		97	84.65
Streptomyces hyaluromycini	NBRC 110483	WP_089101835.1		97	85.48
Streptomyces diastatochromogenes	DSM 40608	WP_094217121.1	OXY95518.1	97	87.35
Streptomyces kasugaensis	BCRC 12349	WP_052859303.1		98	89.7
Streptomyces olivochromogenes	NBRC 3561		GAX53512.1	99	82.89
Streptomyces carminius	TRM SA0054	WP_100201925.1	PJE97383.1	97	85.21
Streptomyces cavourensis	1AS2a	WP_114932223.1	ATY97258.1	97	86.95
Streptomyces barkulensis	RC 1831	WP_101256721.1		97	85.68
Streptomyces eurocidicus	ATCC 27428	WP_184743096.1		97	90.33
Streptomyces cahuitamycinicus	13K301	WP_102910465.1	PNG20468.1	97	84.31
Streptomyces populi	A249	WP_103550991.1	PKT71089.1	98	86.01
Streptomyces cinnamoneus	DSM 41675	WP_181143690.1		97	88.29
Streptomyces dengpaensis	XZHG99	WP_099503556.1	AVH58030.1	94	88.41
Streptomyces geranii	A301	WP_105975180.1		97	83.87
Streptomyces solincola	T5	WP_105870808.1	PRH76926.1	95	88.7
Streptomyces dioscori	A217	WP_107015327.1	PSM44447.1	97	85.01
Streptomyces lunaelactis	MM109	WP_108149454.1	AVZ73776.1	98	87.85
Streptomyces nigra	452	WP_108707493.1	AWE50975.1	97	85.48
Streptomyces tirandamycinicus	HNM0039		AWI33037.1	96	84.83
Streptomyces fragilis	NBRC 12862	WP_108951809.1		95	87.68
Streptomyces rishiriensis	NBRC 13407	WP_109000369.1		95	87.71
Streptomyces ardesiacus	NBRC 15402	WP_030399382.1		97	86.95
Streptomyces rubrogriseus	NBRC 15455	WP_174855212.1		97	86.51
Streptomyces orinoci	NRRL B-3379	WP_109282752.1		97	85.34
Streptomyces spongiicola	HNM0071	WP_172607877.1		97	83.68
Streptomyces tateyamensis	ATCC 21389	WP_110666721.1	PYC85415.1	95	81.64
Streptomyces cadmiisoli	ZFG47	WP_053761991.1	AWW38937.1	97	85.45
Streptomyces triticisoli	NEAU-DSCPA1-4-4	WP_112466216.1		97	84.78
Streptomyces diacarni	LHW51701	WP_181860721.1		99	77.93
Streptomyces reniochalinae	LHW50302	WP_181856441.1		99	78.62
Streptomyces globosus	LZH-48	WP_114058067.1	AXE26896.1	95	87.95
Streptomyces atratus	SCSIO_ZH16	WP_114245831.1	AXE79296.1	98	88.81
Streptomyces lincolnensis	LC-G	WP_067435002.1	AXG54151.1	94	86.89
Streptomyces paludis	GSSD-12	WP_228447256.1		99	84.53
Streptomyces corynorhini	AC230	WP_114623074.1	RDG38586.1	97	87.07
Streptomyces armeniacus	ATCC 15676	WP_208885531.1	AXK36806.1	99	84.19
Streptomyces olivoreticuli subsp. olivoreticuli	ATCC 31159	WP_205519225.1		96	89.69
Streptomyces triticagri	NEAU-YY421	WP_128555527.1	RFU86915.1	99	84.01
Streptomyces griseorubiginosus	3E-1		AYC40401.1	99	86.41
Streptomyces hoynatensis	KCTC 29097	WP_120679705.1	RKN41752.1	96	85.48
Streptomyces radicis	DS1-2	WP_120697022.1	RKN23336.1	96	86.9
Streptomyces klenkii	KCTC 29202		RKN70363.1	99	89.61
Streptomyces hundungensis	BH38		AYG81427.1	99	85.87
Streptomyces fungicidicus	TXX3120	WP_121546473.1	AYL36724.1	97	85.01
Streptomyces dangxiongensis	Z022	WP_163010739.1		97	85.95
Streptomyces rapamycinicus NRRL 5491	NRRL 5491	WP_121824413.1	UTP32901.1	95	88.89
Streptomyces triticirhizae	NEAU-YY642	WP_122183509.1	RMI41842.1	95	86.27
Streptomyces botrytidirepellens	NEAU-LD23	WP_123101623.1	RNG22398.1	97	87.85
Streptomyces chrestomyceticus JCM 4735	NBRC 13444	WP_125045463.1	GCD35569.1	98	89.74
Streptomyces paromomycinus	NBRC 15454	WP_125054769.1	GCD43714.1	98	89.98
Streptomyces tsukubensis	NRRL 18488		QKM69120.1	99	83.3
Streptomyces aquilus	GGCR-6	WP_126272806.1	AZP18676.1	98	86.25
Streptomyces cyaneochromogenes	MK-45	WP_126393098.1	AZQ35621.1	97	86.89
Streptomyces griseoviridis	F1-27	WP_164784944.1		97	86.89
Streptomyces cavernae	SYSU K10008	WP_128381121.1		97	86.38
Streptomyces cyaneus	CGMCC 4.1671	WP_128432058.1		97	85.95
Streptomyces roseicoloratus	TRM44457	WP_128985001.1		97	85.94
Streptomyces sioyaensis	DSM 40032	WP_129250402.1	RXS60771.1	98	93.44
Streptomyces otsuchiensis	OTB305	WP_103502127.1		97	83.53
Streptomyces seoulensis	KCTC 9819	WP_031184039.1	QBJ91117.1	97	88.24
Streptomyces hainanensis	DSM 41900	WP_132820742.1	TDC68817.1	99	84.44
Streptomyces palmae	JCM 31289		TGA87346.1	99	86.76
Streptomyces bauhiniae	Bv016	WP_135787834.1	TGN73918.1	97	87.53
Streptomyces rhizosphaericola	1AS2c	WP_028419553.1	TGZ11559.1	97	87.18
Streptomyces hawaiiensis	ATCC 12236	WP_175433255.1	QCD56631.1	97	85.95
Streptomyces piniterrae	jys28	WP_136740879.1	TJZ52866.1	98	89.75
Streptomyces galbus	DSM 40089	WP_137302505.1	TKT06920.1	97	85.98
Streptomyces lasalocidi	X-537	WP_137307468.1	TKT01439.1	97	85.75
Streptomyces antimycoticus	NBRC 12839	WP_137966280.1	GDY43587.1	94	88.86
Streptomyces sporangiiformans	NEAU-SSA 1	WP_119103019.1	TPQ19292.1	97	86.25
Streptomyces montanus	NEAU-C151	WP_138049580.1	TLS41258.1	98	86.15
Streptomyces marianii	ICN19	WP_171053034.1		98	83.88
Streptomyces tibetensis	XZ 46	WP_104786004.1		97	85.25
Streptomyces albidochromogenes	DSM 41800	WP_138902671.1		97	87.5
Streptomyces mimosae	3MP-10	WP_139675147.1	KAB8158840.1	95	85.82
Streptomyces sedi	JCM 16909	WP_139649885.1	TNM25079.1	95	85.82
Streptomyces spinoverrucosus	NBRC 14228	WP_141312349.1	GEC07810.1	97	86.48
Streptomyces ipomoeae	B12321	WP_141574577.1	TQE16524.1	98	85.01
Streptomyces puniciscabiei	DSM 41929		TQK98195.1	99	86.21
Streptomyces calvus	DSM 41452	WP_142194637.1	QDI69575.1	97	86.57
Streptomyces benahoarensis	MZ03-37	WP_143941176.1	TSB28888.1	98	88.81
Streptomyces capillispiralis	DSM 41695	WP_145868597.1	TWF86763.1	97	85.61
Streptomyces brevispora	DSM 42059		TWG04764.1	99	88.05
Streptomyces qinzhouensis	SSL-25		QDY77477.1	99	81.84
Streptomyces marokkonensis	OANH409	WP_149552890.1		97	85.81
Streptomyces cacaoi	OABC16	WP_030886785.1		95	80.92
Streptomyces apricus	SUN51	WP_149509316.1	KAA0942904.1	96	87.35
Streptomyces tailanensis	TRM68348	WP_149824657.1		97	85.98
Streptomyces filamentosus	ATCC 23958	WP_150232959.1	KAA6218856.1	99	84.88
Streptomyces albofaciens JCM 4342	ATCC 23873	WP_150248463.1	KAA6214576.1	98	89.28
Streptomyces alboniger	ATCC 12461	WP_055529878.1	QEV18768.1	94	89.37
Streptomyces fradiae ATCC 10745 = DSM 40063	ATCC 10745		KAF0651081.1	98	86.71
Streptomyces prasinus	ATCC 13879	WP_055605768.1	QEV06997.1	97	85.48
Streptomyces kanamyceticus	ATCC 12853	WP_079043778.1	QEU93549.1	100	87.7
Streptomyces viridosporus T7A	ATCC 39115	WP_016825690.1	QEU86407.1	95	88.41
Streptomyces subrutilus	ATCC 27467	WP_150519083.1	QEU80070.1	99	86.87
Streptomyces nitrosporeus	ATCC 12769	WP_150488435.1	QEU73117.1	98	86.48
Streptomyces galilaeus	ATCC 14969	WP_150471598.1	QEU66670.1	96	86.02
Streptomyces chartreusis	ATCC 14922	WP_150501599.1	QEV69331.1	97	86.21
Streptomyces spectabilis	ATCC 27465	WP_150511782.1	QEV60699.1	100	87.05
Streptomyces platensis	ATCC 23948	WP_085926959.1	QEV54145.1	97	92.02
Streptomyces vinaceus	ATCC 27476	WP_132757775.1	QEV49911.1	99	87.33
Streptomyces coeruleorubidus	ATCC 13740	WP_150481618.1	QEV26198.1	97	85.01
Streptomyces luteolifulvus	HIT-DPA4	WP_150947969.1	KAB1147304.1	97	87.76
Streptomyces triticiradicis	NEAU-H2	WP_151469435.1	KAB1988529.1	98	86.48
Streptomyces albicerus	TRM68295	WP_151483610.1		96	87.65
Streptomyces arboris	TRM68085	WP_151512568.1	KAB2589468.1	97	86.95
Streptomyces abyssomicinicus	CHI39	WP_151774323.1		99	84.76
Streptomyces phaeolivaceus	GY16	WP_152169788.1	QFQ98321.1	99	84.1
Streptomyces cinereoruber	ATCC 19740	WP_062753195.1		97	87.59
Streptomyces adustus	NBRC 109810	WP_152894497.1	MPY36881.1	97	86.62
Streptomyces spongiae	NBRC 106415	WP_152773090.1	MPY59612.1	97	85.48
Streptomyces phyllanthi	TISTR 2346	WP_152788211.1	MPY43232.1	97	85.38
Streptomyces acidicola	K1PN6	WP_152862736.1	MPY49734.1	97	85.65
Streptomyces fagopyri	QMT-28	WP_153289931.1	QFZ75673.1	96	85.71
Streptomyces kaniharaensis	SF-557	WP_153461114.1	MQS12850.1	97	80.14
Streptomyces jumonjinensis	NRRL 5741	WP_153525743.1	MQT04348.1	97	88.73
Streptomyces katsurahamanus	T-272	WP_153487258.1	MQS39764.1	97	88.73
Streptomyces smaragdinus	RB5	WP_228390082.1	MQY13056.1	97	81.97
Streptomyces blattellae	TRM63209	WP_155059046.1		96	86.16
Streptomyces taklimakanensis	TRM43335	WP_155070923.1	MTE19624.1	97	86.62
Streptomyces lycii	TRM 66187		KAF4410520.1	99	84.72
Streptomyces apocyni	TRM 66233	WP_156725356.1		97	86.27
Streptomyces ficellus	NRRL 8067	WP_156693655.1	QGV79924.1	99	87.13
Streptomyces typhae	p1417	WP_157167425.1	MVO87858.1	100	83.96
Streptomyces broussonetiae	T44	WP_158922136.1	QHA05439.1	97	85.71
Streptomyces caniferus	NBRC 15389	WP_246295536.1	GFE05259.1	97	92.49
Streptomyces glebosus	NBRC 13786	WP_190142925.1	GFE15024.1	97	91.78
Streptomyces libani subsp. libani	NBRC 13452	WP_018089728.1	GFE22762.1	97	92.71
Streptomyces boluensis	YC537	WP_161701606.1	NBE54619.1	97	87.12
Streptomyces harenosi	PRKS01-65	WP_164393313.1		97	86.15
Streptomyces coryli	A7024	WP_165239832.1	NGN66517.1	97	82.2
Streptomyces mesophilus	YC504	WP_165335412.1	NGO79981.1	97	85.95
Streptomyces scabichelini	HC44	WP_165266889.1	NGO13448.1	98	86.74
Streptomyces ureilyticus	YC419	WP_165339497.1	NGO42880.1	96	86.94
Streptomyces boncukensis	SB3404	WP_165300524.1	NGO70871.1	96	80.33
Streptomyces liangshanensis	QMT-12	WP_167031449.1	QIQ04179.1	95	90.14
Streptomyces lonarensis	NCL716	WP_167971474.1	NJQ06924.1	97	83.57
Streptomyces bohaiensis	11A07	WP_168089515.1	NJQ16805.1	97	83.57
Streptomyces physcomitrii	LD120	WP_168540857.1	NKI43198.1	97	87.79
Streptomyces harbinensis	NA02264	WP_051130995.1	QKV70168.1	95	86.51
Streptomyces microflavus	NA06532	WP_063895837.1	QKW44527.1	97	86.68
Streptomyces rectiverticillatus	B15-08		QLE73459.1	99	89.61
Streptomyces fulvorobeus	DSM 41455	WP_173314576.1	NYE42194.1	97	88.32
Streptomyces gossypiisoli	TRM 44567	WP_180685745.1		97	86.45
Streptomyces alkaliterrae	OF8	WP_143646333.1	MBB1258897.1	97	83.68
Streptomyces himalayensis subsp. aureolus	PSKA54		MBA4865889.1	99	87.16
Streptomyces calidiresistens	DSM 42108		MBB0232043.1	99	85.62
Streptomyces alkaliphilus	DSM 42118		MBB0246376.1	99	84.67
Streptomyces durbertensis	DSM 104538	WP_182857876.1	MBB1246633.1	97	84.6
Streptomyces paradoxus	DSM 43350	WP_184561086.1		97	87.12
Streptomyces olivoverticillatus	CECT 3266	WP_184346410.1	MBB4891914.1	97	89.6
Streptomyces echinatus	CECT 3313	WP_184965630.1	MBB5927761.1	97	86.18
Streptomyces zagrosensis	CECT 8305	WP_184570104.1	MBB5934526.1	97	85.49
Streptomyces nymphaeiformis	SFB5A		MBB4986309.1	97	85.95
Streptomyces luteogriseus	DSM 40483	WP_184910049.1	MBB4714327.1	97	85.95
Streptomyces rutgersensis	NBH77	WP_100456272.1	QNE82498.1	99	86.18
Streptomyces buecherae	AC541	WP_187060074.1	QNJ41807.1	98	86.5
Streptomyces genisteinicus	CRPJ-33		QNP63929.1	99	84.17
Streptomyces roseirectus	CRXT-G-22		QNP71950.1	99	83
Streptomyces polyasparticus	TRM66268-LWL	WP_187816973.1	MBC9716537.1	97	85.71
Streptomyces griseicoloratus	TRM S81-3	WP_188185809.1	MBD0424931.1	97	86.28
Streptomyces xanthii	CRXT-Y-14	WP_188337654.1	QNS04951.1	98	85.81
Streptomyces fuscichromogenes	CGMCC 4.7110	WP_189266086.1	GGN26622.1	97	85.01
Streptomyces albiflavescens	CGMCC 4.7111	WP_189186170.1	GGN60948.1	97	86.05
Streptomyces daqingensis	CGMCC 4.7178	WP_189036393.1	GGO46299.1	97	85.22
Streptomyces lacrimifluminis	CGMCC 4.7272	WP_189145219.1	GGJ08456.1	97	84.15
Streptomyces camponoticapitis	CGMCC 4.7275	WP_189110059.1	GGK14308.1	97	87.16
Streptomyces kronopolitis	CGMCC 4.7323	WP_189101193.1	GGN54509.1	98	92.51
Streptomyces lasiicapitis	CGMCC 4.7349	WP_189174928.1		99	86.65
Streptomyces flaveus	JCM 3035	WP_189323088.1	GGK73653.1	96	87.2
Streptomyces brasiliensis	JCM 3086	WP_189313305.1	GGJ31037.1	97	87.12
Streptomyces fumigatiscleroticus	JCM 3101	WP_189290982.1	GGM03377.1	97	86.25
Streptomyces ruber	JCM 3131	WP_189214591.1	GGQ37676.1	98	85.25
Streptomyces cinerochromogenes	JCM 3385	WP_189295053.1	GGS51540.1	97	87.12
Streptomyces albospinus	JCM 3399	WP_189301127.1	GGU67462.1	98	94.82
Streptomyces abikoensis	JCM 4002	WP_189453303.1	GGP61463.1	98	86.74
Streptomyces flaveolus	JCM 4032	WP_189233958.1	GGQ94512.1	97	86.81
Streptomyces netropsis	JCM 4063	WP_184736401.1	GGR14122.1	98	88.76
Streptomyces parvus	JCM 4069	WP_150196987.1	GGS16753.1	97	86.21
Streptomyces phaeofaciens	JCM 4125	WP_189713422.1	GGT64701.1	97	85.51
Streptomyces diastaticus subsp. diastaticus	JCM 4128	WP_100456272.1	GGU19843.1	99	86.18
Streptomyces gougerotii	JCM 4136	WP_100456272.1	GGU80081.1	99	86.18
Streptomyces massasporeus	JCM 4139	WP_189591049.1	GGV75742.1	97	85.71
Streptomyces narbonensis	JCM 4147		GGV97851.1	99	86.21
Streptomyces sindenensis	JCM 4164	WP_189528399.1	GGP80049.1	97	86.68
Streptomyces gancidicus	JCM 4171		GGQ25638.1	95	87.23
Streptomyces eurythermus	JCM 4206	WP_189751862.1	GGR61097.1	97	86.42
Streptomyces niveoruber	JCM 4234		GGS28583.1	91	87.91
Streptomyces bellus	JCM 4292	WP_193508075.1	GGU36255.1	97	84.78
Streptomyces roseolilacinus	JCM 4335	WP_189532921.1	GGQ05649.1	97	89.23
Streptomyces aurantiogriseus	JCM 4346	WP_189942230.1	GGR45040.1	97	86.62
Streptomyces aureoverticillatus	JCM 4347	WP_189739434.1		100	85.78
Streptomyces badius	JCM 4350	WP_069735454.1	GGS82069.1	97	86.21
Streptomyces filipinensis	JCM 4369	WP_191873062.1	GGU88520.1	97	85.48
Streptomyces pilosus	JCM 4372	WP_189598258.1	GGV64786.1	97	84.45
Streptomyces gelaticus	JCM 4376	WP_189545761.1	GGV90428.1	96	87.11
Streptomyces griseomycini	JCM 4382	WP_184823803.1	GGQ24375.1	97	87.18
Streptomyces griseostramineus	JCM 4385	WP_184823803.1	GGR39081.1	97	87.18
Streptomyces humidus	JCM 4386	WP_190151849.1	GGS07587.1	95	86.96
Streptomyces janthinus	JCM 4387	WP_193479728.1	GGS63662.1	97	84.54
Streptomyces kurssanovii	JCM 4388		GGT20424.1	99	86.62
Streptomyces lateritius	JCM 4389		GGU03460.1	99	87.36
Streptomyces lavendofoliae	JCM 4391	WP_189550259.1		99	87.36
Streptomyces litmocidini	JCM 4394		GGV17584.1	99	87.13
Streptomyces longisporoflavus	JCM 4396	WP_190083787.1	GGV53957.1	95	87.77
Streptomyces melanogenes	JCM 4398		GGP35730.1	99	89.43
Streptomyces roseolus	JCM 4411	WP_189951066.1		99	85.52
Streptomyces rubiginosohelvolus	JCM 4415	WP_189429608.1	GGR77676.1	97	86.45
Streptomyces rubiginosus	JCM 4416	WP_006133872.1	GGS48373.1	95	87.23
Streptomyces toxytricini	JCM 4421	WP_189809605.1	GGT01027.1	99	85.94
Streptomyces variabilis	JCM 4422	WP_048459042.1	GGT73348.1	97	85.75
Streptomyces griseoflavus	JCM 4479	WP_190100269.1	GGV48489.1	97	84.95
Streptomyces lucensis JCM 4490	JCM 4490	WP_190017481.1	GGW65966.1	97	85.71
Streptomyces malachitofuscus	JCM 4493	WP_190166438.1	GGX28187.1	97	85.58
Streptomyces nashvillensis	JCM 4498		GGY59936.1	99	86.67
Streptomyces olivaceoviridis	JCM 4499	WP_014673419.1	GGY74008.1	97	85.71
Streptomyces plicatus	JCM 4504	WP_029393625.1	GGZ76405.1	97	85.13
Streptomyces purpurascens	JCM 4509	WP_189729289.1	GHA52500.1	97	84.78
Streptomyces termitum	JCM 4518	WP_189974302.1		99	86.68
Streptomyces vinaceusdrappus	JCM 4529	WP_029393625.1	GHC19421.1	97	85.13
Streptomyces violaceochromogenes	JCM 4530	WP_191847022.1	GHC76429.1	97	85.71
Streptomyces violarus	JCM 4534	WP_184599409.1	GHD13431.1	97	84.31
Streptomyces caelestis	JCM 4566		GGW61619.1	97	85.25
Streptomyces hiroshimensis	JCM 4586	WP_190022357.1		99	90.14
Streptomyces xanthochromogenes	JCM 4594	WP_167158066.1	GGY56835.1	97	88.29
Streptomyces pluricolorescens	JCM 4602	WP_189429608.1	GGZ63547.1	97	86.45
Streptomyces tendae	JCM 4610	WP_189745875.1	GHA84369.1	97	87.44
Streptomyces finlayi	JCM 4637	WP_189822117.1	GHC81475.1	97	89.7
Streptomyces goshikiensis	JCM 4640		GHD77004.1	99	86.64
Streptomyces naganishii JCM 4654	JCM 4654	WP_190179200.1	GHD91341.1	98	84.15
Streptomyces alanosinicus	JCM 4714	WP_189949537.1	GHE00161.1	97	87.32
Streptomyces albaduncus	JCM 4715	WP_184763907.1	GGW45110.1	98	85.81
Streptomyces noursei	JCM 4718	WP_189861263.1	GGX19242.1	98	96.71
Streptomyces anandii JCM 4720	JCM 4720	WP_189705865.1	GGX88743.1	97	85.78
Streptomyces avidinii	JCM 4726		GGZ26857.1	99	87.3
Streptomyces bluensis	JCM 4729	WP_134033400.1	GGZ76809.1	96	87.08
Streptomyces canarius	JCM 4733	WP_189884794.1	GHA17254.1	97	85.48
Streptomyces chryseus	JCM 4737	WP_138895611.1		97	87.5
Streptomyces cirratus	JCM 4738		GHB79708.1	99	85.88
Streptomyces anthocyanicus	JCM 4739	WP_161270150.1	GHC20187.1	97	86.51
Streptomyces flavofungini	JCM 4753	WP_190116053.1	MBJ3806904.1	100	86.14
Streptomyces minutiscleroticus	JCM 4790	WP_190189574.1	GGX63538.1	97	84.6
Streptomyces omiyaensis	JCM 4806	WP_229883200.1	GGY24085.1	97	86.42
Streptomyces poonensis	JCM 4815	WP_189855990.1	GGY95405.1	95	87.23
Streptomyces tauricus	JCM 4837	WP_189771818.1	GHA25156.1	97	85.65
Streptomyces thermoviolaceus subsp. thermoviolaceus	JCM 4843	WP_125497111.1	GHB05072.1	97	86.65
Streptomyces viridiviolaceus	JCM 4855	WP_189871742.1	GHB36385.1	97	86.95
Streptomyces xantholiticus	JCM 4863	WP_189889054.1	GGW53376.1	95	88.94
Streptomyces lomondensis	JCM 4866	WP_190053635.1	GGX23647.1	97	85.25
Streptomyces fructofermentans	JCM 4956	WP_190034320.1		99	86.67
Streptomyces djakartensis	JCM 4957	WP_190199038.1	GGY27273.1	97	85.05
Streptomyces geysiriensis	JCM 4962		GGY64332.1	97	84.67
Streptomyces inusitatus	JCM 4988	WP_190124894.1	GGZ44845.1	97	88.32
Streptomyces echinoruber	JCM 5016	WP_190058679.1	GGZ95643.1	95	88.7
Streptomyces capitiformicae	CGMCC 4.7403	WP_189784605.1	GHE32431.1	97	85.75
Streptomyces spiralis	JCM 3302	WP_189900773.1	GHE74861.1	97	86.65
Streptomyces mashuensis	JCM 4059	WP_190130033.1	GHF46620.1	97	86.74
Streptomyces capoamus	JCM 4253	WP_189985556.1	GHG69234.1	97	87.12
Streptomyces fumanus	JCM 4477	WP_190204779.1	GHF03333.1	95	87.92
Streptomyces griseocarneus	JCM 4580	WP_190064563.1	GHG65048.1	96	87.74
Streptomyces lanatus	JCM 4588	WP_190075917.1	GHH30613.1	97	85.51
Streptomyces candidus	JCM 4629	WP_185029320.1	GHH46710.1	97	88.73
Streptomyces griseoluteus	JCM 4765	WP_135791999.1	GHF18555.1	97	88.47
Streptomyces griseosporeus	JCM 4766	WP_110628877.1	GHF79804.1	97	87.12
Streptomyces longispororuber	JCM 4784	WP_190135644.1		100	82.72
Streptomyces morookaense	JCM 4793	WP_171079051.1		97	87.09
Streptomyces thermodiastaticus	JCM 4840	WP_189796189.1	GHF71137.1	98	86.68
Streptomyces zaomyceticus	JCM 4864	WP_189836129.1		99	86.67
Streptomyces umbrinus	JCM 4958	WP_055617456.1	GHH44592.1	96	87.41
Streptomyces sulfonofaciens	JCM 5069	WP_189936701.1		100	84.07
Streptomyces griseofuscus	DSM 40191	WP_037653359.1	QNT94521.1	97	86.18
Streptomyces tuirus	JCM 4255	WP_190900192.1	BCL21276.1	97	85.95
Streptomyces aurantiacus	JCM 4677	WP_190851098.1	BCL28911.1	96	87.35
Streptomyces chumphonensis	KK1-2	WP_191210222.1	MBD3932923.1	96	87.59
Streptomyces caniscabiei	ND05-3B	WP_045556004.1	MBE4738175.1	98	85.48
Streptomyces ferrugineus	CCTCC AA2014009	WP_194044589.1	QOV37522.1	97	86.42
Streptomyces chromofuscus	DSM 40273	WP_189700305.1	QOV47335.1	97	86.92
Streptomyces olivaceus	SCSIO T05	WP_194277155.1		97	86.71
Streptomyces solisilvae	HNM0141	WP_069870630.1	QPI57073.1	94	89.35
Streptomyces gardneri	ATCC 15439		QPK50663.1	99	86.44
Streptomyces clavuligerus	F1D7	WP_009997129.1	QPL75711.1	99	86.41
Streptomyces bathyalis	ASO4wet	WP_197351960.1	QPP08164.1	97	85.42
Streptomyces pactum	ATCC 27456	WP_197989781.1	MBH5336356.1	97	88.14
Streptomyces sabulosicollis	PRKS01-29	WP_198269662.1	MBI0295986.1	97	86.37
Streptomyces javensis	DSM 41764	WP_198279544.1	MBI0316748.1	97	86.51
Streptomyces fildesensis	INACH3013	WP_232485322.1		97	85.42
Streptomyces murinus	Am1	WP_085565340.1		97	86.42
Streptomyces adelaidensis	CAP261	WP_200304028.1		98	84.54
Streptomyces liliifuscus	ZYC-3	WP_200396698.1	QQM41715.1	96	87.65
Streptomyces actinomycinicus	RCU-197	WP_201833176.1	MBL1081847.1	97	86.89
Streptomyces musisoli	CH5-8	WP_201827064.1	MBL1110218.1	97	87.12
Streptomyces coffeae	CA1R205	WP_201870611.1	MBL1095329.1	97	85.81
Streptomyces endocoffeicus	CA3R110	WP_201852432.1	MBL1114617.1	97	86.98
Streptomyces silvae	For3	WP_129264891.1	MBL1290396.1	97	87.65
Streptomyces spororaveus	NBRC 15456		GHI79386.1	99	86.87
Streptomyces xanthophaeus	NBRC 12829	WP_031145338.1	GHI88277.1	98	86.48
Streptomyces koyangensis	SCSIO 5802	WP_030770559.1	QRF03825.1	96	88.6
Streptomyces pratensis	S10	WP_203181742.1		98	87.41
Streptomyces rubradiris	NBRC 14000	WP_189992456.1	GHI57010.1	97	85.95
Streptomyces asoensis	NBRC 13813	WP_189921167.1	GHI61780.1	97	85.15
Streptomyces durocortorensis	RHZ10	WP_205081833.1	MBM7053601.1	97	86.68
Streptomyces californicus	FDAARGOS_1209	WP_030113312.1	QRV28460.1	99	85.71
Streptomyces zhihengii	YIM T102	WP_205374760.1	MBM9620824.1	99	85.09
Streptomyces actuosus	VRA1	WP_205383251.1	MBN0045042.1	97	86.01
Streptomyces verrucosisporus	CPB1-1	WP_206346856.1	MBN3928778.1	97	87.09
Streptomyces beijiangensis	DSM 41794	WP_206961077.1	MBO0511668.1	97	81.13
Streptomyces triculaminicus	JCM 4242	WP_086568508.1	MBO0653104.1	97	86.89
Streptomyces nodosus	ZJB2016050	WP_043441394.1		97	85.92
Streptomyces laculatispora	NRRL B-24909	WP_207319260.1	MBO0918550.1	97	88.29
Streptomyces cyanogenus	S136	WP_208032904.1	QTD99296.1	97	86.42
Streptomyces nojiriensis	JCM 3382		GGR87185.1	99	87.1
Streptomyces smyrnaeus	DSM 42105		MBO8203000.1	99	79.24
Streptomyces oryzae	S16-07	WP_209241467.1	MBO8194365.1	95	82.06
Streptomyces spirodelae	DW4-2	WP_209266684.1	MBO8187874.1	94	82.85
Streptomyces montanisoli	MMS17-BM035	WP_209339181.1	MBP0457410.1	97	86.37
Streptomyces iranensis	DSM 41954	WP_044573606.1	MBP2064384.1	97	86.98
Streptomyces clavifer	DSM 40843	WP_056797243.1	MBP2359891.1	96	87.17
Streptomyces syringium	DSM 41480	WP_209516193.1	MBP2404520.1	98	88.52
Streptomyces rhizosphaericus	DSM 41760	WP_086885899.1		97	86.51
Streptomyces yatensis	DSM 41771	WP_211124988.1		95	88.65
Streptomyces liliiviolaceus	BH-SS-21	WP_210881131.1	MBQ0847433.1	96	87.14
Streptomyces tardus	P38-E01	WP_211040038.1	MBU7597032.1	99	83.71
Streptomyces indonesiensis	DSM 41759	WP_086885899.1		97	86.51
Streptomyces asiaticus	DSM 41761	WP_086885899.1		97	86.51
Streptomyces alfalfae	XN-04		QUI32393.1	99	86.73
Streptomyces lavendulae subsp. lavendulae	Del-LP		QUQ55177.1	99	86.96
Streptomyces brasiliscabiei	IBSBF 2867	WP_086761665.1		98	84.6
Streptomyces cangkringensis	DSM 41769	WP_086885899.1		97	86.51
Streptomyces corallincola	J2-1	WP_217785115.1	MBV2354704.1	97	86.81
Streptomyces halstedii	LGO-A4	WP_103490254.1	MBV7670166.1	98	87.18
Streptomyces poriferorum	P01-F02	WP_219573634.1	MBW5261422.1	97	88.81
Streptomyces akebiae	MG28	WP_220648014.1	QYX79210.1	97	85.05
Streptomyces plumbidurans	KC 17012	WP_108008807.1	MBY8339943.1	95	87.68
Streptomyces decoyicus	NRRL 2666	WP_030086964.1	QZY17588.1	98	92.74
Streptomyces parmotrematis	Ptm05	WP_222975813.1	MBY8884941.1	97	83.76
Streptomyces sennicomposti	RCPT1-4	WP_164387989.1	MBY8869625.1	97	86.21
Streptomyces acidipaludis	PLK6-54	WP_222963004.1	MBY8878860.1	99	84.44
Streptomyces angustmyceticus	JCM 4053	WP_174886945.1	UAL67660.1	98	93.21
Streptomyces griseiscabiei	NRRL B-2795	WP_086761665.1	MDX2915123	98	84.6
Streptomyces purpurogeneiscleroticus	DSM 43156	WP_223732977.1	MBZ4016177.1	97	91.06
Streptomyces huiliensis	SCA2-4		MBZ4322803.1	99	85.01
Streptomyces mobaraensis	DSM 40587	WP_185941516.1	UBI37361.1	97	85.78
Streptomyces werraensis	JCM 4860		GHF00030.1	97	86.92
Streptomyces solaniscabiei	FS66	WP_225635176.1		99	85.68
Streptomyces aculeolatus	DSM 41644	WP_225796096.1		94	82.93
Streptomyces spinosus	SBTS01	WP_171155168.1		97	86.42
Streptomyces hyderabadensis	JCM 17657	WP_226026608.1	GAA5010634.1	97	86.98
Streptomyces hydrogenans	NBRC 13475	WP_226652037.1	GHI23073.1	95	87.98
Streptomyces daghestanicus	NBRC 12762	WP_189414445.1		97	86.05
Streptomyces violascens	NBRC 12920	WP_189965131.1		97	87.24
Streptomyces bambusae	T110	WP_226734286.1	MCB5166136.1	97	88.76
Streptomyces pinistramenti	SF28	WP_227046771.1	MCB5908260.1	98	90.47
Streptomyces flavotricini	NGL1	WP_229338412.1	MCC0097428.1	99	87.1
Streptomyces anulatus	YINM00001	WP_075347661.1		97	86.74
Streptomyces barringtoniae	JA03	WP_228624501.1	MCC5479901.1	97	85.71
Streptomyces huasconensis	D23	WP_230901492.1	UFQ16500.1	98	87.01
Streptomyces gobiensis	1_25	WP_232268893.1	UGY92107.1	97	85.41
Streptomyces albireticuli	NRRL B1670 type B	WP_211305113.1	MCD9142983.1	97	88.68
Streptomyces shenzhenensis	DSM 42034	WP_234542507.1		97	85.25
Streptomyces glomeratus	DSM 41457	WP_234511047.1	MCF1506056.1	97	86.85
Streptomyces indiaensis	DSM 43803	WP_234846559.1	MCF1645952.1	97	85.48
Streptomyces muensis	DSM 103493	WP_234766491.1	MCF1598077.1	95	87.92
Streptomyces fuscigenes	JBL-20	WP_235798677.1	MCF3964052.1	98	87.73
Streptomyces tricolor	DSM 41685	WP_059250408.1	MCG0068882.1	97	87.12
Streptomyces inhibens	NRRL30439	WP_238574764.1	UKY52103.1	98	92.27
Streptomyces deccanensis	KCTC 19241	WP_239755469.1	ULR51542.1	99	84.33
Streptomyces formicae	1H-GS9	WP_242338061.1	UNM15892.1	99	82.62
Streptomyces lichenis	LCR6-01	WP_248636413.1	MCK8680599.1	95	87.02
Streptomyces durmitorensis	MS405	WP_249589201.1	UQT57816.1	98	85.25
Streptomyces neyagawaensis	JCM 4796	WP_055540671.1	MCL6739119.1	99	85.91
Streptomyces panaciradicis	NBRC 109811	WP_249835808.1	MCL6668474.1	98	86.65
Streptomyces phaeoluteigriseus	Qhu-M197	WP_073497731.1	USQ89010.1	97	86.18
Streptomyces sudanensis	MRC017	WP_255115026.1	MCP9958435.1	95	86.51
Streptomyces somaliensis DSM 40738	DSM 40738	WP_168439485.1	NKY15290.1	95	87.47
Streptomyces nigrescens	HEK616	WP_261956208.1	BDM72874.1	98	90.93
Streptomyces humicola	RB6PN25	WP_255924197.1	MCQ4085085.1	97	82.83
Streptomyces rubrisoli	DSM 42083	WP_255932424.1	MCQ4046254.1	97	84.35
Streptomyces justiciae	RA-WS2	WP_256780137.1	MCW8375631.1	97	86.68
Streptomyces samsunensis	DSM 42010	WP_257636099.1	MCQ8836016.1	94	89.1
Streptomyces yangpuensis	CM253	WP_183067933.1	UUY48460.1	99	87.79
Streptomyces albus	DSM 40763		TGG90032.1	99	80.36
Streptomyces thermocarboxydus	K155	WP_019523927.1	UVT10382.1	97	87.38
Streptomyces ginkgonis	KM-1-2	WP_254791408.1		95	86.75
Streptomyces rhizosphaerihabitans	ASQP_78	WP_261701881.1	MCT9003439.1	98	85.78
Streptomyces lusitanus	FZ201	WP_250742427.1		97	86.18
Streptomyces peucetius	NA0869	WP_264244770.1	UYQ62911.1	95	88.67
Streptomyces milbemycinicus	SIPI-054	WP_086013666.1		99	86.94
Streptomyces cellulosae	NBC_01681	WP_019523927.1	MCX4477712.1	97	87.38
Streptomyces viridodiastaticus	NBC_01548	WP_093768667.1	MCX4567594.1	97	86.21
Streptomyces mirabilis	NBC_01472	WP_054235144.1	MCX4609908.1	96	86.7
Streptomyces coelicoflavus	NBC_00465	WP_164384268.1	MCX5037087.1	97	86.98
Streptomyces prunicolor	NBC_00263	WP_266858406.1	MCX5235185.1	98	84.58
Streptomyces phaeochromogenes	NBC_00034	WP_055617456.1	MCX5603581.1	96	87.41
Streptomyces bobili	NBC_00018	WP_266458649.1	MCX5524885.1	96	85.78
Streptomyces tanashiensis	Kala	WP_229885710.1	UZX22577.1	97	86.42
Streptomyces indicus	CGMCC 4.5727	WP_093616860.1	SDL17401.1	98	86.68
Streptomyces prasinopilosus	CGMCC 4.3504	WP_055573362.1	SDC92033.1	97	85.81
Streptomyces jietaisiensis	CGMCC 4.1859	WP_167794913.1	SDF74619.1	97	85.91
Streptomyces wuyuanensis	CGMCC 4.7042	WP_208868101.1	SDN48414.1	97	84.88
Streptomyces misionensis	DSM 40306	WP_070024022.1	SED07246.1	97	85.25
Streptomyces melanosporofaciens	DSM 40318	WP_093462698.1	SEC11455.1	97	86.61
Streptomyces radiopugnans	CGMCC 4.3519	WP_093658903.1	SEQ25907.1	97	85.92
Streptomyces qinglanensis	CGMCC 4.6825	WP_177214372.1	SES34658.1	94	80.68
Streptomyces aidingensis	CGMCC 4.5739	WP_245833865.1		96	84.73
Streptomyces pini	PL19	WP_093847018.1	SFJ80101.1	97	85.98
Streptomyces zhaozhouensis	CGMCC 4.7095	WP_097233615.1	SOD66063.1	95	86.02
Streptomyces coriariae	CMB-FB	WP_142264922.1		95	86.51

## Sheet: MetM homologs
>MetM | Streptomyces albulus NBRC14147
MRRKGLASMAVQVTESAPSVALGPAVALSCRECGQRFPLGPIFACQECFGPLEVAYELPASDPEELKKRIEAGPANIWRYAPLLPVPADVADKPNLNPGFTKLVKADRLAAELGVTGALYVKDDSGNPTHSFKDRVVAIAVEAARAFGFTTLSCSSTGNLAGAVGAAARRAGFKSCVFIPHDLEPGKVVMAAVYGGDLVAIEGNYDDVNRFCSELIGDPLGEGWGFVNVNLRPYYGEGSKTLAYEICEQLGWQLPDQLVIPIASGSQLTKIDKGLKELIALGLVEDKPYKIFGAQAEGCSPVSAAFKAGHEVVKPQKPNTIAKSLAIGNPADGPYVLDIARRTGGAVEDVTDPQIVDAIKLLARTEGIFAETAGGVTVGVTRKLIENGLLDPSLTTVVL…
>SCO4293 | Streptomyces coelicolor A3(2)
MQTAETSTNPTDAAVDLGPATALSCRECGHRVPLGPVFACEECFGPLEIAYDFSDYDAEELRKRIEAGPANIWRYAPLLPVPADVATKPNINPGWTKLVQADNLARELGVTGGLYVKDDSGNPTHSFKDRVVAQAIEAARAFGFTTLSCSSTGNLAGAVGAAAARAGFRSCVFIPHDLEQGKVVMAAVYGGELVGIEGNYDDVNRFCSELIGDPAGEGWGFVNVNLRPYYAEGSKTLAYEICEQLGWRLPDQIVVPIASGSQLTKIDKGLKELIELGLVEDRPYKIFGAQAEGCSPVSTAYKAGHDVVRPQKPNTIAKSLAIGNPADGPYVLDIARRTGGAVEDVTDEQVVDAIKLLARTEGIFAETAGGVTVGVTRKLIENGVLDPSLTTVVLNTGDG…
>SAVERM_3934 | Streptomyces avermitilis MA-4680
MAAQTVASTSVTSPANSVDLGPAAALSCRECGHRVPLGPVFACDECFGPLEIAYDFSGYDTEELRKQIEAGPANIWRYAPLLPVPADVAEKPNINPGWTKLVQADNLARELGVDAGKLFVKDDSGNPTHSFKDRVVAQAIEAARAFDFTTLSCSSTGNLAGAVGAAAARAGFRSCVFIPHDLEQGKVVMAAVYGGELVGIEGNYDDVNRFCSELIGDPAGEGWGFVNVNLRPYYAEGSKTLAYEICEQLGWRLPDQLVVPIASGSQLTKIDKGLQELIKLGLVEDKPYKIFGAQAEGCSPVSVAYKAGQDVVRPQKPNTIAKSLAIGNPADGPYVLDIARRTGGAVEDVNDEQIVDAIKLLARTEGIFAETAGGVTVGVAKKLIESGLLDPTLTTVVLN…
>SLIV_16930 | Streptomyces lividans TK24
MAVQTAETSTNPTDAAVDLGPATALSCRECGHRVPLGPVFACEECFGPLEIAYDFSAYDAEELRKRIEAGPANIWRYAPLLPVPADVATKPNINPGWTKLVQADNLARELGVTGGLYVKDDSGNPTHSFKDRVVAQAIEAARAFGFTTLSCSSTGNLAGAVGAAAARAGFRSCVFIPHDLEQGKVVMAAVYGGELVGIEGNYDDVNRFCSELIGDPAGEGWGFVNVNLRPYYAEGSKTLAYEICEQLGWRLPDQIVVPIASGSQLTKIDKGLKELIELGLVEDRPYKIFGAQAEGCSPVSTAYKAGHDVVRPQKPNTIAKSLAIGNPADGPYVLDIARRTGGAVEDVTDEQVVDAIKLLARTEGIFAETAGGVTVGVTRKLIENGVLDPSLTTVVLNTG…
>XNR_2396 | Streptomyces albidoflavus J1074
MRRKGLAVMAVHTVATPATPSQDTSAVDLGPAVALSCRECGERFPLGPVFACVSCFGPLEVAYDLPTGDPEALRAAIEAGPANIWRYAPLLPVPADVATKPSLNPGFTQLVKADHLAAELGVTGGLYVKDDSGNPTHSFKDRVVAIAVEAARAFGFTTLSCSSTGNLAGAVGAAAARAGFRSCVFIPHDLEQGKVVMAAVYGGDLVGIEGNYDDVNRFCSELIGDPLGEGWGFVNVNLRPYYGEGSKSLAYEIAEQLGWRLPDQIVIPVASGSQLTKIDKGFKELIALGLVEDRPYKIFGAQAEGCSPVSTAYKAGHDVVRPQKPDTIAKSLAIGNPADGPYVLDIARRTGGAVEDVDDAQVVDAIKLLARTEGIFAETAGGVTVGVTRKLIEAGLIDP…
>SGR_3228 | Streptomyces griseus subsp. griseus NBRC 13350
MAVQTVAGSTASSTPAVDLGPAAALSCRECGERFELGPLFACASCFGPLEVAYDLPTGSPEELRKRIEAGPDNIWRYAPLLPVPADVAEKPNINPGFTKLVKADNLARELGVTGGLYVKDDSGNPTHSFKDRVVAIAVEAARAFGFTTLSCSSTGNLAGAVGAAAARAGLRSCVFIPHDLEQGKVVMAAVYGGELVGIEGNYDDVNRFCSELIGDPLGEGWGFVNVNLRPYYGEGSKTLAYEICEQLGWRLPDQIVIPIASGSQLTKIDKGLQELIKLGLVEDKPYKIFGAQAEGCSPVSAAFKAGHDVVRPQKPNTIAKSLAIGNPADGPYVLDIARRTGGAVEDVTDEQVVDAIKLLARTEGIFGETAGGVTLGVTKKLIEAGVIDPTLTTVVVNTG…
>WQO_19550 | Streptomyces globisporus C-1027
MAVQTVAGNATTASPDLGPAAALSCRECGERFELGPLFACASCFGPLEVAYDLPTGSPEELRKRIEAGPDNIWRYAPLLPVPADVADKPNLNPGFTKLVKADNLARELGVTGGLYVKDDSGNPTHSFKDRVVAIAVEAARAFGFTTLSCSSTGNLAGAVGAAAARAGLRSCVFIPHDLEQGKVVMAAVYGGELVGIEGNYDDVNRFCSELIGDPLGEGWGFVNVNLRPYYGEGSKTLAYEICEQLGWRLPDQIVIPIASGSQLTKIDKGLQELIKLGLVEDKPYKIFGAQAEGCSPVSAAFKAGQDVVRPQKPNTIAKSLAIGNPADGPYVLDIARRTGGAVEDVTDEQVVDAIKLLARTEGIFGETAGGVTLGVTKKLIEAGVIDPTLTTVVVNTGDG…
>Strvi_8757 | Streptomyces violaceusniger Tu 4113
MAVQSVESSTTSSTSDASGAFGPAIALSCRECGERFDLGPIFACEVCFGPLEVAYELPAGDPEELRRRIEAGPNSIWRYAPLLPVPADVADQPSLHPGFTQLVKADNLARELGVTGELHIKDDSGNPTHSFKDRVVAIAVQAARTFGFTTLSCSSTGNLAGAVGAAAARAGFRSCVFIPHDLEAGKVVMAAVYGGELVGIEGTYDDVNRFCSELIGDPAGEGWGFVNVNLRPYYGEGSKTLAYEICEQLGWRLPDQIVIPIASGSQLTKIDKGLKELISIGLVEDKPYKIFGAQAEGCSPVSAAFKAGHDVVRPQKPQTIAKSLAIGNPADGPYVLDITRRTGGAVEDVNDEQIVDAIKLLARTEGIFAETAGGVTVGVTKKLIEDGLLDPSLTTVVLN…
>M271_27845 | Streptomyces rapamycinicus NRRL 5491
MSCRECGERFELGPIFACEACFGPLEVAYELPAGDPEGLRRRIEAGPNSIWRYAPLLPVPADVADLPSLNPGFTQLVKADNLARELGVTGELHIKDDSGNPTHSFKDRVVAIAVQAARTFGFTTLSCSSTGNLAGAVGAAAARAGFRSCVFIPHDLEAGKVVMAAVYGGELVGIEGNYDDVNRFCSELIGDPAGEGWGFVNVNLRPYYGEGSKTLAYEICEQLGWRLPDQIVVPIASGSQLTKIDKGLKELIAIGLVEDRPYKIFGAQAEGCSPVSAAFKAGHDVVRPQKPRTIAKSLAIGNPADGPYVLDIARRTGGAVEDVNDEQIVDAIKLLARTEGIFAETAGGVTVGVTKKLIEDGLLDPSLTTVVLNTGDGLKTLDAVAPTTGPSAIIRPTLD…
>I601_0528 | Nocardioides dokdonensis FR1436
MSAVTIEKPTLREGAFGHATGLVCRECGHRVELGPHYACIECFGPLEVAYDFPAVTRAQIEAGPSNIWRYKALLPVPSDIESSPNMEPGFTRLLEARNLAAELGLDKLWVKDDSTNPTNSFKDRVVACALSAAVELKAKVFACPSTGNLANAVAAAGARAGLKTVVFIPSNLETPKQVNSAVFTDSLVAVEGNYDDVNKLASEIAGEEEGWAFVNVNVRPFYAEGSKTLGYEIAEQLGWRLPDQVVIPVASGSQLTKVHKAFRELVDLGLVEDKPVKIYGAQAAGCSPVSTAYKGGVDAIRPVKPDTIAKSLAIGNPADGIYVLDICRETGGAVEDVTDAEVRAGIVSLARTEGIFTETAGGTTVAVLRKLVETGQLDTSLETVVINTGHGLKTLDAVA…
>AMIS_77090 | Actinoplanes missouriensis 431
MTSAVSAPTATPTSPARGLICRACAAEYPLAAQHACYECFGPLEVAYDEAALARVTRAEIEAGPQNIWRYAALLPAGQDPATRVTLDPGLTPLVSAPALAAAVGLTAPLWVKDDSQNPTHSFKDRVVSVALTAAQELGFKRFSCASTGNLANSVAAHAARAGVPSIVFIPSDLEQGKIITTAVYGGDLVAIEGSYDDVNRLCSELVETDEFEDTAFVNVNVRPFYAEGSKTLGYEVAEQLGWRIPAQVVVPMASGELLTKIDKAFSELVEIGLVEAPEGGWTVFGAQSAGCNPIATALHNDTDVITPVKPTGIAKSLNIGDPAAGPYAIEAVKRTGGWMDYADDEEIRAGIRLLAETTGIFAETAGGTTVAVLKKLVEAGKLDPAKETVVYNTGEGLKT…
>alr3293 | Nostoc sp. PCC 7120
MTQATSTPTQTTNATLSALKCKECGAEYELKATHVCEYCFGPLEVKYDYNALRLSVTREKIQAGPNSIWRYRPFLPVTTDNVIDVGTGMTPLVRSHRLARRLGLNKLYIKNDAVNMPTLSFKDRVVSVALSRARELGFTTVSCASTGNLANSTAAIAAHAGLDCCVFIPADLEAGKILGSLIYSPTLMAVKGNYDQVNRLCSEVANTHGWGFVNINLRPYYSEGSKTLGFEVAEQLGWELPDHIVAPLASGSLFTKIYKGFQEFVEVGLVEGKKVRFSGAQAEGCSPIAQAFKEDRDFIKPVKPNTIAKSIAIGNPADGVYAVDIAKKTGGNIESVNDAEIIEGIKLLAETEGIFTETAGGTTVAVLKKLVEAGKIDPDETTVVYITGNGLKTQEAVQG…
>Anacy_5356 | Anabaena cylindrica
MTQAIANLNQANTSILQALKCKECGAEYELKASHVCELCFGPLEVKYDYDALRLSVSREKIQAGPNSIWRYRQFLPVATDNVIDVGTGMTPLVRSHRLARRLGLNKLYIKNDAVNMPTLSFKDRVVSVALSRARELGFTTVSCASTGNLANSTAAIAAHAGLDCCVFIPSDLEAGKIIGSLIYSPTLMAVKGNYDQVNRLCSEVANTHGWGFVNINLRPYYSEGSKTLGFEVAEQLGWELPDHIVAPLASGSLFTKIYKGFKEFVEVGLVEGKNVRFSGAQAEGCSPIAKAFKEGRDFIQPVKPNTIAKSIAIGNPADGVYAVEIAQKTGGNIESVNDAEIIEGMKLLAETEGIFTETAGGTTVAVLKKLVEAGKIDPDETTVVYITGNGLKTQEAIQG…
>SYNPCC7002_A0286 | Synechococcus sp. PCC7002
MTQATLDTAVASLDTANFTALACKECGAEYEPKALHVCEFCFGPLEVKYDYEKIASKVSRESIEAGPKSIWRYKEFLPVAGEPIDVGTGFTPLLKANRLARRLGIKELYIKNDAVNMPTLSFKDRVVSVALTRARELGFSTVSCASTGNLANSTAAIAAHAGLDCCVFIPSDLEAGKVLGTLIYNPILMAVHGNYDQVNRLCSEVANSHGWGFVNINLRPYYSEGSKTLGYEVIEQLGWELPDHVVAPLASGSLFTKIYKGFNEFVKVGLVEDKAVRFSGAQAEGCSPISQAYKEGRDFITPVKPNTIAKSIAIGNPADGVYAVEIANKTNGNIEDVTDAEIVDGIKLLAETEGIFTETAGGTTIAVLKKLVEAGKINPDEKTVVYITGNGLKTQEAVQ…
>sll1688 | Synechocystis sp. PCC 6803
MTTATTTAPEFISACTKLVSKEGNTEYPLKALHICEETFAPLEVAYDYDLIRRHVTRETIEAGPNSIWRYRAFLPVTGKDVIDVGTGMTPLVKSHRLARRLGLKNLYIKNDAVNMPTLSFKDRVVSVALTRARELGFTTVSCASTGNLANSTAAIAAHAGLDCCVFIPADLEAGKVLGTLIYNPTLMAVKGNYDQVNRLCCEVGNSYGWGFVNINLRPYYSEGSKTLGFEVAEQLGWKLPDHIVAPLASGSLFTKIHKGFQEFIKVGLVDDKPVRFSGAQAEGCSPIATAFQEGRDFVKPVKPNTIAKSIAIGNPADGVYALDIARKTNGNIESVNDAEIIEGIKLLAETEGIFTETAGGTTVAVLKKLVEAGKIDPEETTVVYITGNGLKTQEAVQSH…
>tlr0982 | Thermosynechococcus vestitus
MTATLTSTTETAYFTHLKCKECGAEYEPQAIHVCEYCFGPLEVKYDLERLAAAVTRSTIEAGPKSIWRYRPFLPVTSAEPIDVGTGMTPLIKAQRLARRLGLKHLYIKNDAVNMPTLSFKDRVVSVALTRARELGFTTVSCASTGNLANSTAAIAAHAGLDCCVFIPADLEAGKVLGTLIYGPTVMAVEGNYDQVNRLCSEVANTHGWGFVNINLRPYYSEGSKTLGYEVIEQLGWQLPDHIVAPLASGSLFTKIYKGFREFVAVGLVADKPVRCSGAQAVGCSPIAQAYAEGRDFVAPVKPNTIAKSIAIGNPADGVYALEIARKTNGAIAAATDEEIVAGIKLLAETEGIFTETAGGTTIAVLKKLVESGKIDPEEVTVVYITGNGLKTQEAVQNDI…
>aq_608 | Aquifex aeolicus
MAKVKGLKCRECGREYPAEPIHVCEFCFGPLEVVYDYDEIKKNISREKIEKGPKSLWRYVDLLPVENPTVGLTAGFTPLKKAEKLGEVLGLKNLYIKDDSVNHPTLSFKDRVVSVALSKAKEFGFDTAACASTGNLANSVAAHSAQAGMNCFVFIPANLETQKIIGSLVFNPTVVAVEGNYDDVNRLCSEIANDLGWAFVNINIRPYYAEGSKTLAFEVAEQLGWRAPDVVVAPAASGSLYTKIWKGFNELKKVGLIDEVKTRMYGAQAEGCSPIAQAWREGRDFIKPVKPNTIAKSIAIGNPADGIYALQVARESNGAWETATDEEIIEGIKLLAQTEGIFTETAGGTTIAVLKKYVEKGMISPEETVVVYITGNGYKTMEVLEGKLSTPVKIKPTLK…
>HTH_1418 | Hydrogenobacter thermophilus
MTKVKGLVCRECGKEYPVEPIHVCEFCFGPLEVVYDYQEIKKKLSKEKIENGPKSLWRYIDLLPVEYPSVGLNAGFTPLKKAENLGRLLGLENLYIKDDSVNHPTLSFKDRVVSVALSKAKEFGFDTVACASTGNLANSVAAHAAQAGFNCFVFIPANLESQKIFGSLVFKPTVVAVEGNYDDVNRLCSEIANELNWAFVNINIRPFYAEGSKTLAFEVVEQLGWRAPDAVVAPAASGSLITKIWKGLKELYMVGLLDSLKTRVYGAQAEGCSPIAQAWKEGRDFVKPVKPNTIAKSIAIGNPADGIYALQVTKESSGIWETATDEEIIEGIKLLAETEGIFTETAGGTTIAVLKKLAEKGYFSPKEIVVAYITGNGYKTMEVLEGHLPESIRIKPTLA…
>ACP_3389 | Acidobacterium capsulatum ATCC 51196
MAVAFELRCRECGRSYGNAPLSICEDCFTPLEVFCDLEAARGEFTREKIAAGPTSMWRYKALLPVAEDFEPVTPAGWTPLLKAPNLGRRIGANNLYIKNDAVCLPTLSFKDRVVAVALASAKAFGFDTVGCSSTGNLANAVAAQAARMGLKTFILVPADLEAAKILNTQVYGANLVRIDGNYDHVNRLCSQIADRYHWGFVNVNLRPYYAEGSKSVGFEIAEQLGWRLPDNVVVPMAGGSLIRKIHKAFRELVALGLVEDKHVRFFGAQATGCSPIAAAVKAGRTEIEPQRPSTIARSLAIGNPADGRYAAALIQETGGYAEDVSDVELVSAIQELAETEGVFTETAGGVTTAVTARLYAHGRIHPDELTVTCITGNGLKTTDALQGSYELEQAVRPRL…
>AciPR4_0976 | Terriglobus saanensis
MSACTPYELRNMDGKSFGNQPLSICDETFTPLEVHYDLEAAKSLFTRKSIEAGPANIWRYRALLPIPEGFEPDLPVGFTPLVRAKNLGKRIGANNLYVKNDAVCFPTLSFKDRVVSVALANAQAFGFTTVGCSSTGNLANSVAAQAARLGIKACILVPADLEPAKILNTLVYGAQLVRIDGNYDHVNRLCSLIADQYNWGFVNVNLRPYYAEGSKTVGYEIAEQLGWRLPDNVVVPMAGGSLIRKIRKAFKELVYLGLVEDKPVRFFGAQATGCSPISHAVKNNLDHIEPQRPNTIARSLAIGNPADGPQAAKMIRESGGWAEDVSDVEIVSGMQELAETEGIFTETAGGVTTAVTARLYAHGRIHPDDLTVSCITGNGLKTTDALAGKYEAQRAVRPR…
>H7849_26120 | Alloacidobacterium dinghuense
MASSYELCCRECGKRYENQPLSICDECFSPLEVRVDLDAAKKTVTRESIAQGPTNMWRYQALLPVPDDYVPQTPAGWTPLVKAPRLAGRIGAKNLYIKNDAVCMPTLSFKDRVVAVALANAQRFGFDTVGCSSTGNLANSVAAQAARLGLKTYILVPADLEAAKILNTQVYGANLIRIDGNYDHVNRLSSQIADRFSWGFVNVNLRPYYAEGSKTVGFEIAEQLSWRLPDNVVVPMAGGSLITKIRKAFKELIALGLVDAKDVRFFGAQATGCSPIARAVKTGADHIEPQRPSTIARSLAIGNPADGIYAAKAIRESGGWAEDVSDVEVVSGIQELAETEGIFTETAGGVTTAVTARLYAHGRIKPDELTVTCITGNGLKTTDVLAGAYEQSEAIRPRL…
>G3M70_13910 | Candidatus Nitronauta litoralis
MSFVKGLRCKECSKGYEKLPIHVCEYCFGPLEVDYDYEGIQKVISRKSIQDGPPSMWRYRPLLPIDGDPQVGHHTGYTPLVKADNLARALGVKEIYVKNDSVNHPTFSFKDRVVAIAITKALEMGFDTVSCASTGNLANSVSAQAAEAGLKSCIFIPDGLETGKIIGTLVYGTKLIAINGSYDDVNRLCSEIAATHNWAFVNINIRPYYGDGSKSYGYEIAEQLGWRTPDNVVVPVAGSSLITKIWRAFNEFKDLGLIDKVTSKIFAAQATGCSPVTTAIKNGSEMITPVKPNTIAKSIAIGNPADGYYGIKTTQVSGGWGEDITDQEVVEGMRLLAETEGIFTETAGGVTVGVTKKLIEQGRIKPDETTVICVTGNGLKTIEALDGQYEMPSVIQPNI…
>THEYE_A1678 | Thermodesulfovibrio yellowstonii
MKYVKGLKCRECGREYPVEPIYVCEFCFGPLEAVYDYPKIKRALSRKVIEKRPKTLWRYKELLPIDGEPQAGLNSGFTPLVKAENLAKFLGVKELYIKDDTVAHPTLSFKDRVVAVALTKAKEFGFDTVACASTGNLAHAVSAHGAKSGFHRFIFIPATLEQSKILASIVYEPNLVAVDGNYDDVNRLCSEIANKYRWAFVNINIRPFYAEGSKTIGFEIVEQLGWDTPDSIVVPCASGSLLTKVWKALKEFKEIGIIKDVDTKIYGAQATGCSPISTAFKQGTDVIRPVKPNTVAKSLAIGNPADGYYALQAVRESGGAMEDVSDDEIIEAIKILSRTEGIFAETAGGVTLATYIKLLKEGKIDKKDCTVLCITGNGLKTAEVLNGKTAEVYQIKPNL…
>NSJP_3101 | Nitrospira japonica
MAKMKALTCRECGKEYPTKAIHVCEMCFGPLEVKYNYDEIKKTISRQKIEAGPRSMWRYADLLPVEGPAFLGPHAGFTPLVRAKNLGAYLGLDELYIKNDTVNHPTLSFKDRVVAVALTRARELGFETVACASTGNLANSVAAHAASAGMRCYVFIPGDLEAAKVLGNLIYKPNVVEIEGNYDDVNRLCSEIAGEHGWAFVNINIRPYYAEGSKTLAFETVEQLGWRTPDQVVIPMASGSLLTKIWKGLHEMKAIGLIDEVRTRVNGAQAEGCSPISTAFKDGRDFFKPVKPKTIAKSLAIGNPADGYYALKATAESKGAMDMVSDEEVVDGIKLLAQTEGIFAETAGGVTIGVLKKLVKQGTIKKSDVTVAYITGNGLKTQEAVIDAVGRPVRISPSL…
>MCMEM_0683 | Methanococcoides methylutens
MSKVIGLKCRECGAEYEAGIQNTCYECFGPLEVHYDWDEVQDTASKEKIARGPPSIWRYADLLPIDGTNYVDLGAGYNKLHHAKNLGKELGLKELYILDDSVNPTNSFKDRVTSVAVSKALELGATAIGCASTGNLASAVGAHAAKAGIPAYVFIPSSIETGKITQMLTYDPNVIAVDGTYDDANRLASEVADQNPDWAFVNINVRPYYTEGSRTLAFETAEQLGWRAPDHIVAPLGSGALLCALTRGYRELEKIGFIDGGSNIRISGSQPSGCSPISTAVQNDTEVIPIRELDTIAHSLAIGNPADGYYAKQAIQTSGGYAASVTNEEILEAIRLLASTEGIFTEPAGGTTVAGLKKLVESGHIDPDERTVVYVTGNGLKAQDTIAGAVERPESIKSS…
>AF_0551 | Archaeoglobus fulgidus DSM 4304
MYLVALKCRICGTEYPPEPLYHCSLCFGPLEAVYDYEGIKESVSKEEISKRVQSVWRYREFLPTNHDPVDLGAGFTRFIHAKNLGECLGLKNLYLLDDSTNPTYSFKDRVVSVAVTKALEFGMDVVGCASTGNLAGSLAAHAAKAGLKAFIFVPAGIEKNKIVQALVHGATVVEVNGTYDDANRLAAEIAEKNRNWGFVNINLRPYYVEGSKTLAFEAAERLGWEAPSQVVVPVASGALLYSIYRGFKELETVGLIDSAEVAFNAAQPEGFPVARAVKERRQVEPIERFSTIVHSLAIGNPADGIFAKEVVERSGGYAEDPSDAEVIEAVKLLARTEGIFTELAGGVTVAALIRLVEDGRIDRDEKVVAYLTGNGLKTAEAVAETLSTVKIDARVEEFE…
>Nmar_1549 | Nitrosopumilus maritimus
MTRTSLQCRECKKEYETAFKYICDDCFGPLDVKYDFPTVTKDTFSNREHTYWRYFELLPIENKSNIVSIDAGLTPLTKAENLGKALDLNNLYIKNDSVNPTFSFKDRPAGVAISKAKEFGLSAVGCASTGNLASATAAHAAKGGFPCHVFAPSNIEMAKIAQALSYGANYVAVDGTYDDANRIAAQIGDSRGIGIVNINMRSHYVEGSKTLAYEVAEQLDWNVPDQLIVPVGSGAMLNAICKGFEELQQVSLLDDVSNMHMIAAQPHGCAPVVDAFKKNSKDVIPVENPDTVAKSLAIGDPGDGRYVLKRLEQYNGFAEECNNKEILDAILLLAKTEGIFTEPAGGVSVSVLQKMVEQGKIDKNDKVVCYVTGNGLKATESIMEVLEKPNVLKADISEV…
>NVIE_020570 | Nitrososphaera viennensis
MGSIKSLRCRECGKEYEPQFRYVCEECFGPLDVTYREASINRHTFDLREKTYWRYFELLPITDKANVVSLNAGLTPLQHADKLGERLGLKNLYIKNDSVNPTFSFKDRPAGVAVSRAKETKLKAVGCASTGNLASATAAHAAKAGLPCYIFAPSDIEHVKIAQALSYGAEFVAVEGTYDDANRVASIIGDSKGYGIVNINMRPYYVEGSKTLAYEVAEQLGWEVPDRLIIPVGSGAMLNAICKGFEELHALGLVGSVKNLKIVAAQPHGCAPVVDAFKRNSDEVIPVERPETIAKSLAIGDPGDGIYVLKRLKQYGGLAEEVGDEEIRDGIMMLAQSEGIFTEPAGGVSVGVLKKLVDEGNIDKDEKVVCYVTGNGLKATEAIIGVLPKLTAVKPDAAA…

## Sheet: TS homologs
>SaTS | Streptomyces albulus NBRC14147
MSANSTVTTANGQWRGIIEEYRDRLPVSDTTEVVTLREGGTPLVPAQVLSERTGCEVHLKVEGANPTGSFKDRGMTMAITRAKEEGAKAVICASTGNTSASAAAYAVRAGMVCAVLVPQGKIALGKMGQALVHGAKILQVDGNFDDCLTLARGLSEKYPVALVNSVNPVRIEGQKTAAFEIVDMLGDAPDIHVLPVGNAGNITAYWKGYREYAADGIAARTPRMWGFQASGSAPIVRGEVVKDPHTIATAIRIGNPASWEFAERARDESGGLIDDVTDRQILAAYRLLAAKEGVFVEPASAASVAGLLKAAEEGKVDPGQRIVCTVTGNGLKDPDWAVAGAPQPVTVPIDADAAAERLGLG
>SCO5355 | Streptomyces coelicolor A3(2)
MTHQWRGIIEEYRDRLPVSDSTPVVTLREGGTPLVPAQVLSERTGCEVHLKVEGANPTGSFKDRGMTMAISKAKEEGAQAVICASTGNTSASAAAYGVRAGMVSAVLVPQGKIALGKMGQALVHGAKILQVDGNFDDCLTLARALSDNYPVALVNSVNPVRIEGQKTAAFEIVDMLGDAPDIHVLPVGNAGNITAYWKGYQEYAADGVSTKKPRMWGFQASGSAPIVRGEVVKDPSTIATAIRIGNPASWDFALAARDESGGAIDEVTDREILRAYRLLASQEGVFVEPASAASVAGLLKAAEQGKVDPGQRIVCTVTGNGLKDPDWAVAGAPQPVTVPVDAATAAERLGLV
>SAVERM_2917 | Streptomyces avermitilis MA-4680
MTHQWRGIIEEYRDRLPVSDSTPVVTLREGGTPLVPAQVLSERTGCEVHLKVEGANPTGSFKDRGMTMAITRAKEEGAKAVICASTGNTSASAAAYAVRAGMVCAVLVPQGKIALGKMGQALVHGAKILQVDGNFDDCLTLARNLSDNYPVALVNSVNPVRIEGQKTAAFEIVDMLGDAPDIHVLPVGNAGNITAYWKGYQEYAADGIARHKPRMWGFQASGSAPIVRGEVVKDPSTIATAIRIGNPASWKFALAAKDESGGFIDEVTDREILRAYRLLAAQEGVFVEPASAASVAGLLKAAEQGKVDPGQTIVCTVTGNGLKDPDWAVAGAPQPVTVPVDAATAAERLGLA
>SLIV_11715 | Streptomyces lividans TK24
MTHQWRGIIEEYRDRLPVSDSTPVVTLREGGTPLVPAQVLSERTGCEVHLKVEGANPTGSFKDRGMTMAISKAKEEGAQAVICASTGNTSASAAAYGVRAGMVSAVLVPQGKIALGKMGQALVHGAKILQVDGNFDDCLTLARALSDNYPVALVNSVNPVRIEGQKTAAFEIVDMLGDAPDIHVLPVGNAGNITAYWKGYQEYAADGVSTKKPRMWGFQASGSAPIVRGEVVKDPSTIATAIRIGNPASWDFALAARDESGGAIDEVTDREILRAYRLLASQEGVFVEPASAASVAGLLKAAEQGKVDPGQRIVCTVTGNGLKDPDWAVAGAPQPVTVPVDAATAAERLGLV
>XNR_1478 | Streptomyces albidoflavus J1074
MTHQWRGIIEEYRDRLPVSDTTPVVTLREGGTPLVPAQVLSERTGCEVHLKVEGANPTGSFKDRGMTMAISKAKEEGAQAVICASTGNTSASAAAYAVRAGMVSAVLVPQGKIALGKMGQALVHGAKILQVDGNFDDCLTLARALSEQYPVALVNSVNPVRIEGQKTAAFEIVDFLGDAPDIHVLPVGNAGNITAYWRGYREYAADAVSTRTPRMWGFQAAGSAPLVRGEVVKDPATIATAIRIGNPASWDYAIQARDESGGFIDEVTDRQILSAYRLLASQEGVFVEPASAASVAGLLKAAEQGKVDPGQRIVCTVTGNGLKDPDWAVAGAPQPLTVPVDATAAAERLGLA
>SGR_2181 | Streptomyces griseus subsp. griseus NBRC 13350
MTSKGTHQWRGIIEEYRDRLPVTATTPVVTLREGGTPLVPAQVLSERTGCEVHLKVEGANPTGSFKDRGMTMAITRAKEEGAKAVICASTGNTSASAAAYAVRAGMVCAVLVPQGKIALGKMGQALVHGARILQVDGNFDDCLTLARSLSDNYPVALVNSVNPVRIEGQKTAAFEIVDALGDAPDIHVLPVGNAGNITAYWKGYTEYAGDGVSTRSPRMWGFQASGSAPIVRGEVVKDPSTIATAIRIGNPASWNYALAARDESGGFIDEVTDRQILSAYRLLASQEGVFVEPASAASVAGLLKAAEEGKVDPGQRIVCTVTGNGLKDPDWAVAGAPQPVTVPVDAAAAAEKLGLA
>WQO_24610 | Streptomyces globisporus C-1027
MTSKGTHQWRGIIEEYRDRLPVTATTPVVTLREGGTPLVPAQVLSERTGCEVHLKVEGANPTGSFKDRGMTMAITRAKEEGAKAVICASTGNTSASAAAYAVRAGMVCAVLVPQGKIALGKMGQALVHGAKILQVDGNFDDCLTLARALSDNYPVALVNSVNPVRIEGQKTAAFEIVDALGDAPDIHVLPVGNAGNITAYWKGYTEYAGDGVSSRSPRMWGFQASGSAPIVRGEVVKDPSTIATAIRIGNPASWNYALAARDESGGFIDEVTDRQILSAYRLLASQEGVFVEPASAASVAGLLKAAEEGKVDPGQKIVCTVTGNGLKDPDWAVAGAPQPVTVPVDAATAAEKLGLV
>Strvi_1662 | Streptomyces violaceusniger Tu 4113
MNAIADAGPRMSGTRQWHGWRGIIEEYRDRLPVSETTPVVTLREGGTPLVPAQVLSERTGCEVHLKVEGANPTGSFKDRGMTMAISEAKEAGAKAVICASTGNTSASAAAYAVRAGMVCAVLVPQGKIALGKMGQALVHGAKILQVDGNFDDCLTLARGLSEKYPVALVNSVNPARIQGQKTAAFEIVDMLGDAPDVHVLPVGNAGNITAYWKGYKEYAAPFADSEPRASRTPRMWGFQASGSAPIVRGEPVKEPSTIATAIRIGNPASWTYAEQARDESGGFIDEVTDRQILAAYRLLAAQEGVFVEPASAASVAGLLKAAEQGLVDPGQRIVCTVTGNGLKDPDWAVAGAPQPVVVPVDTDAAAVRLGLA
>M271_17160 | Streptomyces rapamycinicus NRRL 5491
MSGTRQWHGWRGIIEEYRDRLPVSGTTPVVTLREGGTPLVPAQVLSERTGCEVHLKVEGANPTGSFKDRGMTMAISVAKEAGAKAVICASTGNTSASAAAYAVRAGMVCAVLVPQGKIALGKMGQALVHGAKILQVDGNFDDCLTLARGLSEKYPVALVNSVNPARIEGQKTAAFEIVDMLGDAPDIHVLPVGNAGNITAYWKGYTEYAAPFADSGPHASRTPRMWGFQASGAAPIVRGEPVKEPSTIATAIRIGNPASWTFAEQARDESGGLIDEVTDRQILAAYRLLAAQEGVFVEPASAASVAGLLKAAEQGLVDPGQRIVCTVTGNGLKDPDWAVAGAPQPVVVPVDADAAAVRLGLA
>I601_3942 | Nocardioides dokdonensis FR1436
MNTDQLDREPGARTATRQWRGVIEEYRHLLEIPQDTPAVTLREGGTPLVHSGWLSGLTGADVHLKVEGDNPTGSFKDRGMTAAISVAKHEGARAVVCASTGNTSASMAAYAAKAQMTPLVLVPEGKIAAGKMAQAIVHGAQVIMVRGNFDDCLGIAKGLAEQYPVALVNSVNPVRLQGQKSAAFEIVDFLGDAPDFHLLPVGNAGNISAYWMGYRQYAELGHATKRPVMRGFQAEGASPLVTGTPFPEPETKATAIRIGNPASWSLAVEATEESGGRFAAVSDDQILAAQRLLATHDGVFVEPASAAGVAGLLAELEAGESYAGSTVVITVTGHGLKDTATALEAYSADQAEQGRPSIVDTVIDNDVVAAARAAGLA
>AMIS_72260 | Actinoplanes missouriensis 431
MWRGLIEAYRDRLPVTDATPVVSLHEGNTPLVPAPVLSSRVGADVYLKVEGANPTGSFKDRGMTMAVSKAVEEGAKAIICASTGNTSASAAAYAARAGITCAVLVPQGKIALGKLAQALVHGARLLQVDGNFDDCLALASKLSQDYPVALVNSVNIFRLHGQKTASFEIVEALGDAPDIHCLPVGNAGNISAYWMGYQEDQAAGNSTKLPKMYGFQASGAAPIVNGKVVENPSTIATAIRIGNPASWTKALDARDASGGLISAVTDRDILNAYRLLAREVGVFVELGSAASVAGLLQQAAAGQIPAGSRVVCTVTGHGLKDPEWAISTAPSPTVIANDALIAAKALDLA
>all2072 | Nostoc sp. PCC 7120
MTLSLSVAKSHRQPWPGLIEAYREYLPVSDKTPVVTLLEGNTPLIPVPAIAERIGRQVSVFVKYDGLNPTGSFKDRGMTMAISKAKEDGAKAVICASTGNTSAAAAAYARRGGMKAFVLIPDGYVALGKLAQALLYGAEVLAIKGNFDQALEIVREMAESYPITLVNSVNPYRLEGQKTGAFEVVDALGNAPDWLCIPVGNAGNITAYWMGFCQYHQAGKCDRLPQMMGFQAAGAAPLVNGQPVSHPETIATAIRIGKPASWDKAIAAQSASQGSFNAVTDEEILDAYRLLASSEGIFCEPASAASVAGLLKVKDQVPTGATVVCVLTGNGLKDPDTAIKHSHSQFKQGIEADLSSVAKAMGF
>Anacy_2253 | Anabaena cylindrica
MTLSLSVAKSHCQPWPGLIEAYREYLPVSESTPVVTLLEGNTPLIPVPAIAERIGKQVKVFVKYDGLNPTGSFKDRGMTMAISKAKEAGAKAVICASTGNTSAAAAAYARRGGMKPFVLIPDGYVALGKLAQALLYGAEVLAIKGNFDRALEIVREMADSYPITLVNSVNPYRLEGQKTGAFEVVDALGNAPDWLCIPVGNAGNITAYWMGFCQYHQDGKCDRLPKMMGFQAAGAAPLVNGKPVANPETLATAIRIGNPASWDKAIAAQSASQGSFNAVTDEEILDAYRLLASSEGIFCEPASAASVAGLLKVKDQVPTGATVVCVLTGNGLKDPDTAIKHSHAQFKQGIPADIKAVAEAMGFE
>SYNPCC7002_A1402 | Synechococcus sp. PCC7002
MVLSTPKADPTSAPFPTHHAAKWPGLINAYRQYLPVTDSTPVVTLYEGNTPLIPIPSIAAEIGRGVQVYAKYDGLNPTGSFKDRGMTMAITKAKEAGAEAVICASTGNTSAAAAAYARRAGLRAFVLIPDGYVALGKLAQALLYGAEVIAIEGNFDNALSIVRQMSENYPVTLVNSVNPYRLQGQKTAAFEVVDALGEAPDWLCIPVGNAGNITAYWMGFCEYHELNKATKLPRMMGFQASGAAPFIQGGPVHNPETLATAIRIGNPVNWDKAHGVQAASQGAFNAVTDEEIIEAYRKLGANEGIFCEPASAASVAGLLKVKDQVPTGATVVCVLTGNGLKDPDAAIAHSLSKGQTGIPANMAAVAKAMGF
>sll1172 | Synechocystis sp. PCC 6803
MISCHSFTMTPSAPNSTVLPSATPVCPQSSACRWRGLIETYRPYLPVSDQTPVVTLLEGNTPLIPAPAIAKRIGKDVRVFVKYDGLNPTGSFKDRGMTMAISKAKEAGAKAVICASTGNTSAAAAAYARRAGLRAFVIIPDGYVALGKLGQALIYGAEVIAIDGNFDDALTTVRQLSEHYPVTLVNSVNPYRLEGQKTAAFEIVDVLGQAPDWLCIPVGNAGNITAYWMGFCQYKELGKGDRLPRMMGFQAAGSAPFIQGQPISHPETLATAIRIGNPANWDKAWAASRESNGEFHPVTDAEILEAYRILAAEEGVFCEPASAASVAGLLKQKDQVPAGATVVCVLTGNGLKDPDCAVQNSGNQVKAGLKPDLEIVAKAMGF
>tll1227 | Thermosynechococcus vestitus
MAKIIVLCGCTLSSASNLFIFLDCVPVPVTLSAPPIRPAWHGLIHAYGDFLPVSDRTPVVTLYEGNTPLIPVPQIAARIGRNVSVYVKYDGLNPTGSFKDRGMTMAISKAKEAGAEAVICASTGNTSAAAAAYARRAGLRAYVLVPEGYVAQGKLAQALLYGAEVIAIEGNFDKALEIVRLMAETYPVTLVNSVNPYRLEGQKTAAFEVVDSLGNAPDWLCIPMGNAGNITAYWMGFCQYREQNRCDRLPRMMGFQAAGSAPLVKGEIVTHPETIATAIRIGNPANWQRAIAVKEASQGAFNAVTDEEILKAYCLLASEEGIFCEPASAASVAGLLKLADQVPSGATVVCVLTGNGLKDPETALKQESDRFHRHIEPTEQTVAKVMGF
>aq_425 | Aquifex aeolicus
MNRWQGIIKQYKKYLPVDENTPIVTLYEGNTPLIEADNLARAIGFKGKIYLKYEGLNPTGSFKDRGMTLAISKAVEAGKRAVICASTGNTSASAAAYAARAGLRAYVLLPKGAVAIGKLSQAMIYGAKVLAIQGTFDDALNIVRKIGENFPVEIVNSVNPYRIEGQKTAAFEICDTLGEAPDYHFIPVGNAGNITAYWKGFKIYYEEGKITKLPRMMGWQAEGAAPIVKGYPIKNPQTIATAIKIGNPYSWKSALKAAQESGGKIDAVSDSEILYAYKLIASTEGVFCEPASAASVAGLIKLVREGFFKGGEVVTCTLTGNGLKDPDTAIKVCEEPITVPPDFDEVVKVLGF
>HTH_1367 | Hydrogenobacter thermophilus
MNYWRGIINKYREYLPISENTPVITLCEGNTPLIHAENLAREIGFKGEIYLKYEGLNPTGSFKDRGMTLAISKAVEAGKKAVICASTGNTSASAAAYAAKAGLKAYVLLPKGAVALGKLSQAVMYGAKVIAVQGNFDDALYMVRKIGELLPVEIVNSVNPFRIEGQKTAAFEVCDALGEAPDYHFIPVGNAGNITAYWKGYLEYYRVGKIRKLPKMMGWQAEGAAPIVKGYVIKNPQTIASAIRIGNPYSWQQALAAANESKGRIDAVSDEEILNAYKLVASKEGIFCEPASAASIAGLIKLVREGYLSGKEVVVCTLTGNGLKDPSTAMSVCQEPITLPPDIEKVLEVIEL
>ACP_0228 | Acidobacterium capsulatum ATCC 51196
MRAAHQLRCTGCGQVTPPEEIAGDFRCAACGELFAVEYPGWAGAAPPNPGALRWLWKERRSSLAAADQSGVWRFRELLPIVQEHEIVTLREGNTPLYHLTQNAERLALPELYAKHQGMNPTASFKDTGMTAALSVAKARGFRWVACASTGNTSAAMAAYAARAGMRSLVLVPDGKIAWSKLAQSMDYGALTLQLKTDFDGCVAVLREVVRRAPVYLLNSVNPYRVEGQKTPAMEIVEALDWQAPEHVIVPGGNLANISALGKGFAEMHALGLLPVLPKLSVIQAEGANPLVRTMHEFSGEKLEPVEAQTRATAIRIGNPASWKKAVAVLRATGGTVEQVSEAEIALAKARLGAEGIGCEPASAVTLAGLEKMLIAGKVQRGERVVLLLTGHTLKDADYT…
>AciPR4_1188 | Terriglobus saanensis
MNMRSHQLRCIGTGERIAPEDAPHDFRDPETRELYEIEYPWSESAETSGTPHRNLPNPSALRHLWAERRDSTLPIDQSGVWRYRELLPILKDDNTATTLREGNTPLYDLPRCAKSLGLDFLLAKHQGMNPTGSFKDTGMTAALSVAVERGYEWVACASTGNTSAAMAAYAARAGLRSIVFIPEGKIAWGKLSQSMDYGAMTVQLKTDFDGCVRILAELVKRHPIYLLNSVNPYRLEGQKTPAVEMVEQLDWQVPHHVIVPGGNLANGSALGKGFAEMKHLGLIDRVPKISVIQAMGANPLFQWFTNDHKEIDPVVADTRATAIRIGNPASWRKAARIIETTNGWCEQVSESEIAFAKAQIGAEGIGCEPASAVTLAGLKKLVAQGRVESGERTVLLLTG…
>H7849_09875 | Alloacidobacterium dinghuense
MENSGHLLRCTGCARVIEQRELKENFRCPECGDLYEVVYPSWSAGMAEIRKPNASAMRWLWKERCCSNTEADQSGVWRFREMLHILDDEANIVSLREGNTPLYELRRVAESTGIEHVFAKHQGMNPTGSFKDAGMTTALSVAHELGFDWVACASTGNTSAAMSAYAARAGMRSLVLIPQGKIAWGKLSQAMDYGALTLQLRTDFDGCVRVLNEVVKRAPVYLLNSVNPYRLEGQKTPALEIAETFDWEVPDHLIVPGGNLANSSALGKAFLEMKHLGLVTKLPKISVIQAEGANPLYRSLLSNSGETLEPVEAHTRASAIRIGNPASWKKAVRVIQQTGGYCEQVSEAEIALAKAEIGAEGIGCEPASAVTLAGLKKLIQQGKVQSNEKVVLLLTGHTL…
>G3M70_17345 | Candidatus Nitronauta litoralis
MSEPTEVSKGVFNAWFQCMNGCSTRHALTEIIYKCPECDSLLEVVHDMEALKTRSATDWKRLFEERYRKNDWPYGSSVWGKKELVCPVVDNENIVSTYEGASNLFWAERLGNELGMKDLWVKQCGMSHTGSFKDLGMTVLVSMVKQMRSEGQNIKAVACASTGDTSAALAAYCAVADIPAIVFLPKGKVSLTQLIQPIAHGVLTLSLDTDFDGCMKVVQQISAGNEIYLANSMNSLRIEGQKTISFELVQQFDWEVPDVVIVPGGNLGNVSAIGRGFKMWYDLGIINKLPRLVCAQAERANPLARCFKTNYEKFEPVQAQTTQASAIQIGNPVSVMKAIRALKEFDGVVEDATENELSNAVGRANRTGLLCCPHTGVALAALEKLVKRGVIKKNERVVV…
>THEYE_A1681 | Thermodesulfovibrio yellowstonii
MNTKSHWKGIISEYFEHFPVNEKTPIVTLLEGNTPLVKVNNLTKKLNIDLELYLKFDGANPTGSFKDRGMTLAISKAVEEGSKAVICASTGNTSASASAYAARAGIKAIVLIPEGKIATGKLVQAMIHGAKVIQIKGNFDQALNIVRAIVNEYPITLVNSINPYRIEGQKSAAFEVCDQLGRVPDYHALPVGNAGNISAYWKGYKEYREKGKINSLPKMLGFQASGAAPIVLGHPVEKPETVATAIRIGNPASWKTAVAARDESGGTIDMVTDEEILYAYKMIASCEGIFCEPASAASVAGVIKLYKQGYFKKQSTVVCTLTGNGLKDPDIVFKVADEPLVLPADLESVKAFVEKIL
>NSJP_0749 | Nitrospira japonica
MKPWRGLIEEYRKFLPVTEHTPVVSLGEGHTPLIRAAKLAKKIAPGIDLYLKVEGANPTGSFKDRGMTMAISKALEGGAQAVICASTGNTSASAAAYGARAGLAVYVLIPAGKIAMGKLSQAMMHQATVIQIDGNFDQALSIVKEVSALHHIELVNSLNPYRIEGQKTAAMEVCDQLGDAPTLHVLPVGNAGNITAYWKGYQEYRAANQTTRSPRMMGFQAAGAAPMVLGHIVENPQTVATAIRIGNPASWQAASDVIRDSSGFIDSVLDEEILQAYTMVAGTEGVFCEPASAASVAGVIKLSRQGALREGDTVVCTLTGHGLKDADTAISVSVQPKTVQATKEDVARFLKV
>PH0857 | Pyrococcus horikoshii
MVLRCVVCGREYPEDEVRYRCDCGGLLEVVIDLDKVDTSIFNGRDIKLWKYESWLPVKKRVSLEEGGTPLYRLSNLENELKVKELYAKNEGANPTGSFKDRGMTVGVSKALELGMDKVICASTGNTSASLAAYAAKAGIKAYVLIPSGKIALGKLAQAIIHGAKVIPIKGNFDDALRIVVEASRELGIYMLNSINPFRLEGQKTIAYEIYDQLGKVPDNIILPVGNAGNISAIWKGFKEMYEAGVIDELPRMIGIQAEGASPLVKAWKEKKKFQPEENPETVASAIRIGNPANWIKAWKAVEESGGLFESVSDEEILRAQRLLASREGLFVEPASAASLAGLIKLLESGEISRNESYILITTGHGLKDPNIVIKNFQIPEPIEPTLEAFKEVIK
>VNG_2430G | Halobacterium salinarum NRC-1
MTDLSLAGETPACATDGVWLACVECGGTLAPFADVVYRCPECSGLLEARYADYPGFEAFSGRGVWRYADALPVDAGVSVQEGDTPLYEAPDVAAAAGVADVRVKHEGMNPTGSFKDRGMTVGVRVAERLGVDRLACASTGNTSAALAAYGGRADTPVLVLLPAGKVAAGKIAQAALHGARICEVDGNFDDCLDVVAELAARGEAYLLNSLNPFRLEGQKTIAFEILEQSRTATGEWPDRIVLPVGNAGNTAALYKAFRELVAAGAMTDDEMPALTGVQAAGAAPMVEAVEAGRGRTERWTDVETRATAIRIGNPVNAPKALPGVYETGGTAVAVSDDRITDAQRMLAGDGIGVEPASAASVAGLLALRERGEISADERVVCLTTGHLLKDPAAAAAAGG…
>APE_2286 | Aeropyrum pernix K1
MACGSKYPSSPRLFTCPKCGGLLEPFYIDGGSPRGRGVWRYRDLLPRPRRIVTMGEGSTPLVKLENLSRAMGVEVYGKLEFLNPTGSFKDRGMTVGVSIASSFSYRLVVAASTGNTAASMAAYARRAGLNPVILIPKGGIASGKLSQIAALGAWVLEVEGSFDDALDAARAAAEKGLAYSLNSINPYRLEGQKTIAFEILEDVDRVDHVVVPVGNAGNISAIWKGFKEAGLLGLPSMRPRMVGVQAEGASPLYRAWVEKMDSVERVRNPSTIASAIRIGNPVNAAKALAAVRESDGLIISVSDAEILKAAATLAENEGMLVEPASAASLAGLIKLRNQGIIASGSSVVLILTGHGLKDPRALEFIASSAGVRRAYASTAEEALLKLEEIAVGG
>STK_12400 | Sulfurisphaera tokodaii 7
MQGYLKCLDCGSEYPIQQDIITCPKCGGLLEIIVEPKKDFSFSKLKGKGVWRYRELIAGEYKHIVSLNEGNTPLIASSTNKNLYFKFEGANPTGSFKDRGMTVAISSAKSLNYKVVVAASTGNTAASAAAYASRAGLRSYIVLPKGKVALGKLAQSILYGTTILEVDGSFDVAMNSVMKLYRELKIVYPLNSFNPWRLEGQKTIAFEIVEDIGVPDNVIVPVGNAGNIYAIWKGFVELMNIGVTDKVPRMIGIQAEGAAPIAKALEKGLDKPEFIDSPETVASAIRIGKPVNWKKAIKAIKSSNGFATYVSDSEILEAQKELARREGIGAEPASAASYAGYLKLVNSGKIDKSEKTVLILTGHALKDPDAMIKAESRRILVNPEHINEIILSDLK
>MCMEM_1845 | Methanococcoides methylutens
MYQLECIECGQKYTDSEVVYTCKCGGLLDVIYDYSAIQLDMERLRTEAPSVWKYKALLPVEGKPVSIHEGGTPLYRCDRLAEKIGIKELYVKHEGLNPSGSFKDRGMTAGVTKAMELGMKTLACASTGNTSASLSTYGAKAGLPVIVLLPEGKVALGKVAQALIHGAKVLSIKGNFDEAVVLVRQLCDEEKIYLLNSINPYRLEGQKTIGHEICDQLGFNVPDRVIVPVGNAGNTAAIYKGFKEFMELGITDSVPKMTGIQTEGACPVTKAFKMGVEDIVPEKNPETIATAIRIGNPVNAKKALRAIYESGGCSEAVSDEELIEAQKDLAQLEGIGVEPASATSIAGLKKLIDSGVIDHDEKVVCVTTGHLLKDPEEVMNISTKPITVDANIEAVRKAV…
>AF_1316 | Archaeoglobus fulgidus DSM 4304
MYRLKCIECGKEWGDENYTCECGGLLEVEIDLDEVEIDFRLDGSNITVWKYRSLLPVKIDPVTLKEGGTPLYRAERLEKEVGVRRVYVKHEGLNPSGSFKDRGMTVGVTKALELGRKAVACASTGNTSASMAMYAAKAGLKAYVLLPAGKVALGKVAQALMHGAKVIGIDGNFDDALRIVREVCSREPIYLLNSINPFRPEGQKTIAYEIADEIGVPDRVVLPVGNAGNISAIYKGFKELREVGLTDSMPKMTGIQAEGAAPIYRAFKEGKEDITPMENPETIATAIRIGNPVSAKKALRAIYSTNGLAEVVSDSEIIEAQKFLAAKEGIGVEPASAASVAGLRKLAANGMLDPDETIVCVVTGNLLKDPETVVRVCGEPVKVEASVEAVIRAMRA
>Nmar_0833 | Nitrosopumilus maritimus
MQGDAYLKCIDPQCGMEYPIESTNVQCEKGHLLDVKYKHTPSENLKEVFYNRRNSQGNIFNESGVWRFRELLNFCQIDTENIEECSKYLVSLDGAEGRLSKPYHMAKASELVGISNDNLWLQPEGYNPSGSFKDNGMATAVTHAKMVGAKKIVCASTGNTSASAGMFAANEGINCDVYIPAGQIAPGKLSQAYQFGAQILEIDGNFDDALKQSLDDAQNHDGYTVNSVNPFRIEGQKTIPFRALEYLNWEVPDWIVYPGGALGNTSSCGKALMELYEWGWIKKIPRIAVINSEGASTLSDLYNGKFEGEELRWNKGNPNTELITRYYDDLDSKGIRPKTKATAIQIGRPANILKGLRALEFTNGVATTVSDSEMLDGMSVVGLNGFDCEMASGASVVGV…
>NVIE_004780 | Nitrososphaera viennensis
MLDIMAEHAVKKCINPDCGKSYGIDNDTYRCTCGSLLDIQYSKKPSRDLIERFYQRRNHGGNIYNESGVWRFRDLINFAGIDTEDFNECARTLVSLDGSEGRLSKPYNMSKAADYADMNHDSFFLQPEGYNPSGSFKDNGMSTAVTHAKMLKVKKIICASTGNTSASAAMYAANEDIQCDVYIPKGEIAPGKLGQAFQFGAQVIQVQGNFDDALATSLKNAKETGGYTVNSVNPFRIEGQKTIVYRVMEQLNWNPPDWIVYPGGALGNTSSCGKALIELYEWGWIKKVPRIAVVNAEGANTLYELYNGMFEGKKLSWNDGRPDLGMVDRYYADLDKRGIRPKTHATAIQIGRPANIVKALRALHFTNGVVVQATDKEMSDGMSIVGLNGFDCEMASGAV…
>Rv1295 | Mycobacterium tuberculosis H37Rv
MTVPPTATHQPWPGVIAAYRDRLPVGDDWTPVTLLEGGTPLIAATNLSKQTGCTIHLKVEGLNPTGSFKDRGMTMAVTDALAHGQRAVLCASTGNTSASAAAYAARAGITCAVLIPQGKIAMGKLAQAVMHGAKIIQIDGNFDDCLELARKMAADFPTISLVNSVNPVRIEGQKTAAFEIVDVLGTAPDVHALPVGNAGNITAYWKGYTEYHQLGLIDKLPRMLGTQAAGAAPLVLGEPVSHPETIATAIRIGSPASWTSAVEAQQQSKGRFLAASDEEILAAYHLVARVEGVFVEPASAASIAGLLKAIDDGWVARGSTVVCTVTGNGLKDPDTALKDMPSVSPVPVDPVAVVEKLGLA
>RHA1_ro01487 | Rhodococcus jostii RHA1
MTGTRNPVHTPWPGLIEAYRDRLAIGPNWKTVTLREGGTPLLPAGHLSELTGCDVYLKVEGLNPTGSFKDRGMTMAVTDALARGQQAVLCASTGNTSASAAAYAAKAKMTCAVLVPQGKIAMGKLAQAVMHGARIIQVQGNFDDCLELARKTTAEFPTIGLVNSVNPVRIEGQKTAAFEICDALGKAPDVHALPVGNAGNITAYWRGYSEYYADGLTSVKPRMLGVQAAGAAPLVHGAPVKDPETIATAIRIGSPASWNGAVTAKEESHGAFRAATDDEILEAYRLIARTEGVFVEPASAASVAGLLAARKEGWLDSGLTVVCTVTGNGLKDPDTALAGMPDVQPIPVDPVAVASALELA
>NFA_10500 | Nocardia farcinica IFM 10152
MSTAGVAPQAGVHSRWPGLIAAYRDRLAGAADWEPVTLFEGGTPLVPAPYLSELTGCEVYLKVEGANPTGSFKDRGMTMAMTDAKYRGQQAVLCASTGNTSASAAAYATRAGMTCAVLIPQGKIAMGKLAQAVMLGAQIIQVEGNFDDCLELARKVTAEFPAVGLVNSVNPARIEGQKTASFEICDVLGKAPDVHALPVGNAGNITAYWRGYREYYADGITGSLPRMLGVQAAGAAPLVHGAPVKEPETIATAIRIGAPASWNGAVAAKEESGGAFRAATDEEILAAYRLVAAKEGVFVEPASAASVAGVLAARADGWLEPGLTVVCTVTGNGLKDPDTALLGMPQVEAIKVDPVAVATRLELA
>TTHA0491 | Thermus thermophilus
MRPPLIERYRNLLPVSEKTPVISLLEGSTPLIPLKGPEEARKKGIRLYAKYEGLNPTGSFKDRGMTLAVSKAVEGGAQAVACASTGNTAASAAAYAARAGILAIVVLPAGYVALGKVAQSLVHGARIVQVEGNFDDALRLTQKLTEAFPVALVNSVNPHRLEGQKTLAFEVVDELGDAPHYHALPVGNAGNITAHWMGYKAYHALGKAKRLPRMLGFQAAGAAPLVLGRPVERPETLATAIRIGNPASWQGAVRAKEESGGVIEAVTDEEILFAYRYLAREEGIFCEPASAAAMAGVFKLLREGRLEPESTVVLTLTGHGLKDPATAERVAELPPPVPARLEAVAAAAGLL
